# Supplementary material for: Consecutive ligand-based PCET processes affording a doubly reduced nickel pyrazinedithiolate which transforms into a metal hydride required to evolve H2
Source: Royal Society of Chemistry journal article supplement (doi:10.1039/c8dt04497j), 2018-11-29
Supplement: c8dt04497j1.pdf [file c8dt04497j1.pdf]

## Supporting Information

### **Consecutive Ligand-based PCET Processes Affording a Doubly Reduced Nickel Pyrazinedithiolate which Transforms into a Metal Hydride Required to Evolve H<sub>2</sub>.**

Keita Koshiba,<sup>†,‡</sup> Kosei Yamauchi,<sup>\*,†,‡</sup> and Ken Sakai<sup>\*,†,‡,§</sup>

<sup>†</sup> Department of Chemistry, Faculty of Science, Kyushu University, Motooka 744, Nishi-ku, Fukuoka 819-0395, Japan

<sup>‡</sup> International Institute for Carbon-Neutral Energy Research (WPI-I2CNER), Kyushu University, Motooka 744, Nishi-ku, Fukuoka 819-0395, Japan

<sup>§</sup> Center for Molecular Systems (CMS), Kyushu University, Motooka 744, Nishi-ku, Fukuoka 819-0395, Japan

E-mail: kyamauchi@chem.kyushu-univ.jp; ksakai@chem.kyushu-univ.jp

## Computational Method

Density functional theory (DFT) calculations were performed using Gaussian 09/16 packages<sup>1</sup> to understand the structural and spin-state candidates. The structures were fully optimized using the B3P86 density functional<sup>2,3</sup> with the effect of solvation in water taken into consideration using the conductor-like polarizable continuum model (C-PCM) method.<sup>4,5</sup> The 6-311+G(2d,p) basis set was applied to all atoms. The use of B3P86/6-311+G(2d,p) level of DFT was reported to show good consistency with theoretical and experimental results for the 1st row transition metal complexes,<sup>6-9</sup> which were further confirmed by our calculations on model systems (data not shown). The redox potentials and  $pK_a$  values are calculated as described in Scheme S1. The structure of the transition state was determined using the TS and QST3 methods, followed by performing the intrinsic reaction coordinate (IRC) calculations.

**Scheme S1.** Isodesminc reaction methods<sup>6-14</sup> for calculating redox potentials and  $pK_a$  values based on the experimentally determined values for the oxidation potential of  $[\text{Ni}^{\text{II}}(\text{dcpdt})_2]^{2-}$  (+0.39 V vs. SCE; dcpdt = 5,6-dicyanopyrazine-2,3-dithiolate) and  $pK_a$  for  $[\text{Ni}^{\text{II}}(\text{dcpdt})(\text{dcpdtH})]^-$  ( $pK_a = 5.0$ ), respectively.  $F$  is Faraday constant,  $R$  is the gas constant, and  $T$  is temperature (298.15 K).

(1) Determination of the redox potential for  $\text{Ox} + e^- \rightarrow \text{Red}$

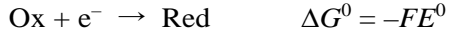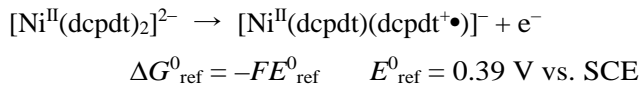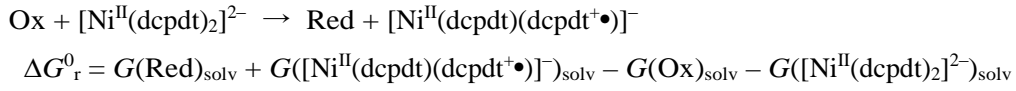

$$\Delta G_{\text{r}}^0 = -\Delta G_{\text{ref}}^0 + \Delta G^0 = FE_{\text{ref}}^0 - FE^0$$

$$E^0 = -\Delta G_{\text{r}}^0 / F + E_{\text{ref}}^0$$

(2) Determination of  $pK_a$  value for  $\text{A} + \text{H}^+ \rightarrow \text{AH}^+$

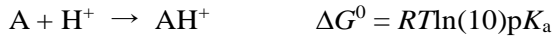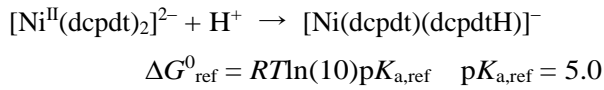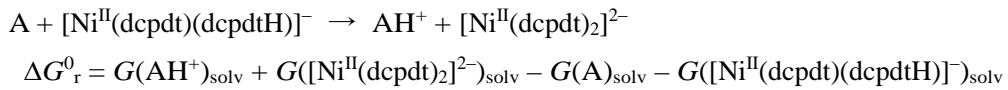

$$\Delta G_{\text{r}}^0 = RT \ln(10) pK_a - RT \ln(10) pK_{a,\text{ref}}$$

$$pK_a = \Delta G_{\text{r}}^0 / RT \ln(10) + pK_{a,\text{ref}}$$

**Scheme S2.** Free energy changes relevant to the catalytic processes by  $[\text{Ni}^{\text{II}}(\text{dcpdt})_2]^{2-}$  ( $\text{M}^{2-}$ ) at each pH condition, as reported elsewhere.<sup>15</sup>

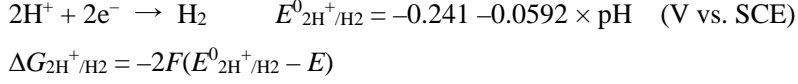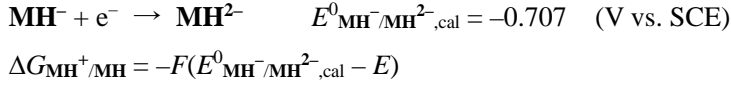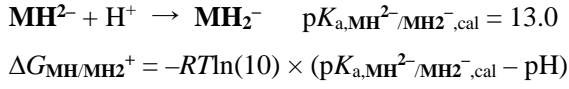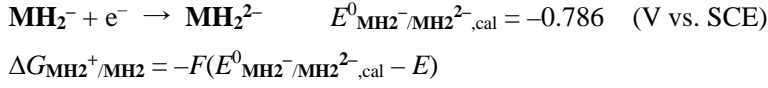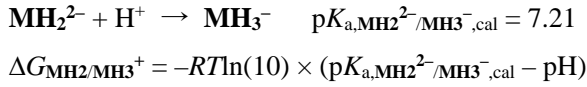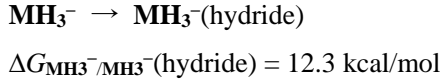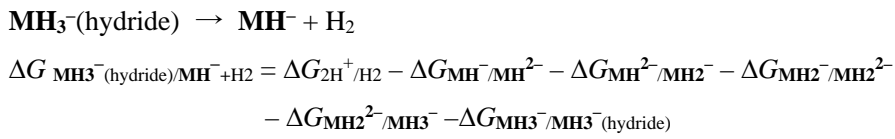

## Measurements

Linear sweep voltammetry was performed on a BAS ALS 602DKM electrochemical analyzer and a BAS RRDE-3A Rotating Ring Disk Electrode Apparatus. For the experiments for the aqueous solutions, a glassy carbon working electrode (5 mm $\phi$ ), a platinum wire counter electrode and a saturated calomel reference electrode (SCE; 0.241 V vs. NHE) were employed, where NaCl (0.1 M) was used as a supporting electrolyte. For the experiments for the organic solutions, a glassy carbon working electrode (5 mm $\phi$ ), a platinum wire counter electrode and an Ag/Ag<sup>+</sup> reference electrode (0.249 V vs SCE) were employed, where TBAPF<sub>6</sub> (tetra(n-butyl)ammonium hexafluorophosphate; 0.1 M) was used as a supporting electrolyte and all potentials reported are given relative to the Fc/Fc<sup>+</sup> couple (Fc/Fc<sup>+</sup> = 0.155 vs SCE). The bulk electrolysis was carried out by an H-type cell (VB-9) purchased from EC Frontier, using a GC rod working electrode (5 mm  $\Phi$ , The Nilaco Corporation), a platinum plate counter electrode, and an SCE. The working compartment was separated from the counter compartment using a cation exchange membrane (Selemion<sup>TM</sup> CMD, AGC Engineering). The time-course of H<sub>2</sub> evolution during the bulk electrolysis was monitored using the automated system developed in our group. These experiments adopted the continuous Ar-flow method (10 mL min<sup>-1</sup>) with the vent introduced into the auto sampler for the gas chromatographic analysis, as described elsewhere.<sup>16</sup> The pH measurements were performed using a DKK-TOA HM-25R pH meter.

## Materials

All solvents and reagents were of the highest qualities available and were used as received without further purification.  $\text{Na}_2[\text{Ni}^{\text{II}}(\text{dcpdt})_2] \cdot 4\text{H}_2\text{O}$  (dcpdt = 5,6-dicyanopyrazine-2,3-dithiolate)<sup>17</sup> and  $\text{Na}_2[\text{Ni}^{\text{II}}(\text{qdt})_2] \cdot 6\text{H}_2\text{O}$  (qdt = quinoxaline-2,3-dithiolate)<sup>18</sup> were synthesized as previously described. The compounds 3,7-bis(dimethylamino)-phenothiazin-5-ium chloride (Methylene Blue; Shuzui-Hikotaro Co., Ltd.), and potassium hexacyanoferrate(III) ( $\text{K}_3[\text{Fe}^{\text{III}}(\text{CN})_6]$ ; Kanto Chemical Co., Inc.) were used as received.

## Determination of the turnover frequencies (TOF's)

The TOF in the electrochemical hydrogen evolution reaction (HER) can be determined by using the following eq. 1,<sup>19-20</sup>

$$k_{obs} = \frac{1}{D_{[Ni(dcpdt)_2]^{2-}}} \left( \frac{i_c}{nFA[cat]} \right)^2 \quad (1)$$

where  $D_{[Ni(dcpdt)_2]^{2-}}$  is the diffusion coefficient of  $[Ni^{II}(dcpdt)_2]^{2-}$  (approximately obtained  $2.8 \times 10^{-6}$   $[cm^2 s^{-1}]$ ; see below),  $i_c$  is the maximum current at the catalytic peak,  $n$  is the number of electrons (2 electrons),  $F$  is the Faraday constant ( $9.6485 \times 10^4$   $[C mol^{-1}]$ ),  $A$  is the surface area of the electrode ( $0.15^2 \times 3.14 = 7.07 \times 10^{-2}$   $[cm^2]$ ), and  $[cat]$  is the concentration of  $[Ni^{II}(dcpdt)_2]^{2-}$  in solution ( $5.0 \times 10^{-7}$   $[mol cm^{-3}]$ ). The  $k_{obs}$  (i.e.,  $TOF_{max}$ ) were calculated as  $TOF_{max} = 11.7, 6.7$  and  $2.1 s^{-1}$  at pH = 4, 5 and 6, respectively.

## Estimation of the diffusion coefficients ( $D$ 's)

Our attempts to determine the diffusion coefficient ( $D$ ) of  $[Ni(dcpdt)_2]^{2-}$  failed due to the strong adsorption of the catalyst over the electrode surfaces while its polarization under all conditions examined, regardless of the choice of solvent, such as water, acetonitrile, DMF and so on. Because of such problematic situation, we decided to adopt the  $D$  value estimated for  $[Ni^{II}(qdt)_2]^{2-}$  as a  $D$  value approximated for  $[Ni(dcpdt)_2]^{2-}$ . We think this is a reasonable approach because of the good resemblance of the two catalysts from the viewpoints of both the molecular size and the dianionic

nature of the systems, as depicted in the following structure diagrams (Scheme S3).

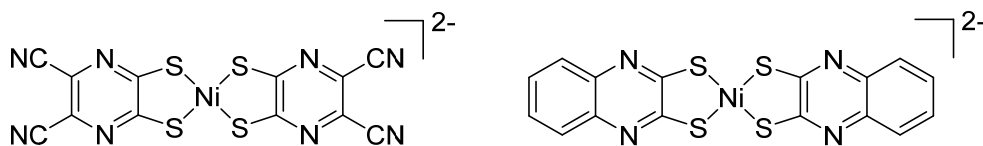

**Scheme S3.** The structures of  $[\text{Ni}^{\text{II}}(\text{dcpdt})_2]^{2-}$  (left) and  $[\text{Ni}^{\text{II}}(\text{qdt})_2]^{2-}$  (right).

In the determination of the  $D$  value of  $[\text{Ni}^{\text{II}}(\text{qdt})_2]^{2-}$ , an additional problem arose due to its adsorption onto the glassy carbon electrode surfaces only upon the anodic polarization performed for its aqueous solutions, even though the adsorption was found to be negligible upon the polarization using its DMF solutions. Because of these multiple problems, we had to indirectly estimate the  $D(\text{H}_2\text{O})$  value of  $[\text{Ni}^{\text{II}}(\text{qdt})_2]^{2-}$  using the observable  $D(\text{DMF})$  value, as explained below. In our approach, the  $D^{\frac{2}{3}v^{-\frac{1}{6}}}$  values, i.e.,  $x_{obs}$  values defined in eq. 2 (see below), were measured for the relevant systems including the reference compounds (i.e., Methylene Blue and  $[\text{Fe}^{\text{III}}(\text{CN})_6]^{3-}$ ). The measurements were carried out using the BAS RRDE-3A Rotating Ring Disk Electrode systems and a glassy carbon disk electrode (5 mm $\phi$ , 0.196 cm $^2$ ). The  $x_{obs}$  values measured are defined by the so-call Levich equation, eq. 2,<sup>21</sup>

$$\begin{aligned}
 i &= 0.62nFACD^{\frac{2}{3}v^{-\frac{1}{6}}}\omega^{\frac{1}{2}} & (2) \\
 &= 0.62nFACx_{obs}\omega^{\frac{1}{2}}
 \end{aligned}$$



where  $i$  is the limiting current,  $n$  is the number of electron (1 electron),  $A$  is the surface area of the electrode ( $0.25^2 \times 3.14 = 0.196$  [cm<sup>2</sup>]),  $C$  is the concentration of the electroactive species ( $5.0 \times 10^{-7}$  [mol cm<sup>-3</sup>]),  $\nu$  is the kinematic viscosity [cm<sup>2</sup> s<sup>-1</sup>], and  $\omega$  is the angular rotation rate of the electrode [rad s<sup>-1</sup>]. One can understand that  $D$  is a solvent-independent value, while  $x_{obs}$  is dependent on the choice of solvent. Therefore, the  $x_{obs}(H_2O)$  value can be estimated by adopting the observed  $x_{obs}(DMF)$  value using the following equation (eq. 3).

$$x_{calcd}(H_2O) = x_{obs}(DMF) \times (\nu_{H_2O}/\nu_{DMF})^{-1/6} \quad (3)$$

The validity of this approach has also been confirmed by measuring the  $x_{obs}$  values of [Fe<sup>III</sup>(CN)<sub>6</sub>]<sup>3-</sup> and Methylene Blue. Moreover, the  $D$  values for the Ni compounds could also be benchmarked using the literature values of  $D$ 's reported for these reference compounds, as summarized in Table S1.

**Table S1.** Diffusion coefficients ( $D$ 's) of  $[\text{Ni}^{\text{II}}(\text{dcpdt})_2]^{2-}$ ,  $[\text{Ni}^{\text{II}}(\text{qdt})_2]^{2-}$ ,  $[\text{Fe}^{\text{III}}(\text{CN})_6]^{3-}$  and Methylene Blue.

| Compounds                                      | $x_{\text{obs}}(\text{H}_2\text{O})$ <sup>[a]</sup> | $x_{\text{calcd}}(\text{H}_2\text{O})$ | $x_{\text{obs}}(\text{DMF})$ <sup>[b]</sup> | $(\nu_{\text{H}_2\text{O}}/\nu_{\text{DMF}})^{-1/6}$ | $D_{\text{calcd}}$<br>[cm <sup>2</sup> s <sup>-1</sup> ] | $D_{\text{ref}}$<br>[cm <sup>2</sup> s <sup>-1</sup> ] | ref |
|------------------------------------------------|-----------------------------------------------------|----------------------------------------|---------------------------------------------|------------------------------------------------------|----------------------------------------------------------|--------------------------------------------------------|-----|
| $[\text{Ni}^{\text{II}}(\text{dcpdt})_2]^{2-}$ | – <sup>[c]</sup>                                    | –                                      | – <sup>[c]</sup>                            | –                                                    | $2.8 \times 10^{-6}$ <sup>[g]</sup>                      | –                                                      | –   |
| $[\text{Ni}^{\text{II}}(\text{qdt})_2]^{2-}$   | – <sup>[c]</sup>                                    | $2.2 \times 10^{-4}$ <sup>[d]</sup>    | $2.2 \times 10^{-4}$                        | 0.99 <sup>[f]</sup>                                  | $2.8 \times 10^{-6}$ <sup>[h]</sup>                      | –                                                      | –   |
| $[\text{Fe}(\text{CN})_6]^{3-}$                | $4.1 \times 10^{-4}$                                | –                                      | – <sup>[e]</sup>                            | –                                                    | $7.2 \times 10^{-6}$ <sup>[i]</sup>                      | $7.6 \times 10^{-6}$                                   | 22  |
| Methylene Blue                                 | $3.8 \times 10^{-4}$                                | –                                      | $3.6 \times 10^{-4}$                        | 1.03                                                 | $6.3 \times 10^{-6}$ <sup>[j]</sup>                      | $6.3 \times 10^{-6}$ <sup>[j]</sup>                    | 23  |

<sup>a</sup> Determined in aqueous solutions.

<sup>b</sup> Determined in DMF solutions.

<sup>c</sup> Values not determined directly due to the adsorption of the compound over the electrode surfaces.

<sup>d</sup>  $x_{\text{calcd}}(\text{H}_2\text{O}, [\text{Ni}(\text{qdt})_2]^{2-}) = x_{\text{obs}}(\text{DMF}, [\text{Ni}(\text{qdt})_2]^{2-}) \times (\nu_{\text{H}_2\text{O}}/\nu_{\text{DMF}})^{-1/6}$

<sup>e</sup> Values not determined due to the low solubility of the compounds.

<sup>f</sup> Calculated from the reported values.<sup>24</sup>

<sup>g</sup> Suggested to be approximately equal to  $[\text{Ni}^{\text{II}}(\text{qdt})_2]^{2-}$ .

<sup>h</sup>  $D_{\text{calcd}}([\text{Ni}(\text{qdt})_2]^{2-}) = D_{\text{ref}}(\text{MB}) \times \{x_{\text{calcd}}(\text{H}_2\text{O}, [\text{Ni}(\text{qdt})_2]^{2-})/x_{\text{obs}}(\text{H}_2\text{O}, \text{MB})\}^{3/2}$

<sup>i</sup>  $D_{\text{calcd}}([\text{Fe}(\text{CN})_6]^{3-}) = D_{\text{ref}}(\text{MB}) \times \{x_{\text{obs}}(\text{H}_2\text{O}, [\text{Fe}(\text{CN})_6]^{3-})/x_{\text{obs}}(\text{H}_2\text{O}, \text{MB})\}^{3/2}$

<sup>j</sup> Used as the benchmark.  $D_{\text{calcd}}(\text{MB}) = D_{\text{ref}}(\text{MB}) \times \{x_{\text{obs}}(\text{H}_2\text{O}, \text{MB})/x_{\text{obs}}(\text{H}_2\text{O}, \text{MB})\}^{3/2}$

As summarized in Table S1, the ratio of the kinematic viscosities of H<sub>2</sub>O and DMF (i.e.,

$(\nu_{\text{H}_2\text{O}}/\nu_{\text{DMF}})^{-1/6} = 0.99$ )<sup>24</sup> was used to estimate the  $x_{\text{calcd}}(\text{H}_2\text{O})$  value of  $[\text{Ni}^{\text{II}}(\text{qdt})_2]^{2-}$  (see the

footnote *d* for Table S1). To the contrary, the  $(\nu_{\text{H}_2\text{O}}/\nu_{\text{DMF}})^{-1/6}$  value could be experimentally

determined as 1.03 using the  $x_{\text{obs}}(\text{H}_2\text{O})$  and  $x_{\text{obs}}(\text{DMF})$  values observed for Methylene Blue in

our experiments, confirming the validity of our approach. All  $D_{\text{calcd}}$ 's were estimated from the ratio

between  $\{x_{\text{obs}}(\text{H}_2\text{O})\}^{3/2}$  using the  $D_{\text{ref}}$  value reported for Methylene Blue<sup>23</sup> as a benchmark (see

also the footnote *j* for Table S1). Furthermore, as summarized in Table S1, the validity of our method

can be further confirmed by the fact that the  $D_{calcd}$  value ( $7.2 \times 10^{-6} \text{ cm}^2 \text{ s}^{-1}$ ), estimated for  $[\text{Fe}^{\text{III}}(\text{CN})_6]^{3-}$  using the above method, matches well with its  $D_{ref}$  value ( $7.6 \times 10^{-6} \text{ cm}^2 \text{ s}^{-1}$ ).<sup>22</sup> On the basis of these observations, we decided to adopt the  $D_{calcd}(\text{H}_2\text{O})$  value of  $[\text{Ni}^{\text{II}}(\text{qdt})_2]^{2-}$  ( $2.8 \times 10^{-6} \text{ cm}^2 \text{ s}^{-1}$ ) as an approximated value of  $D_{calcd}$  for  $[\text{Ni}^{\text{II}}(\text{dcpdt})_2]^{2-}$  in order to estimate the TOF value for the HER.

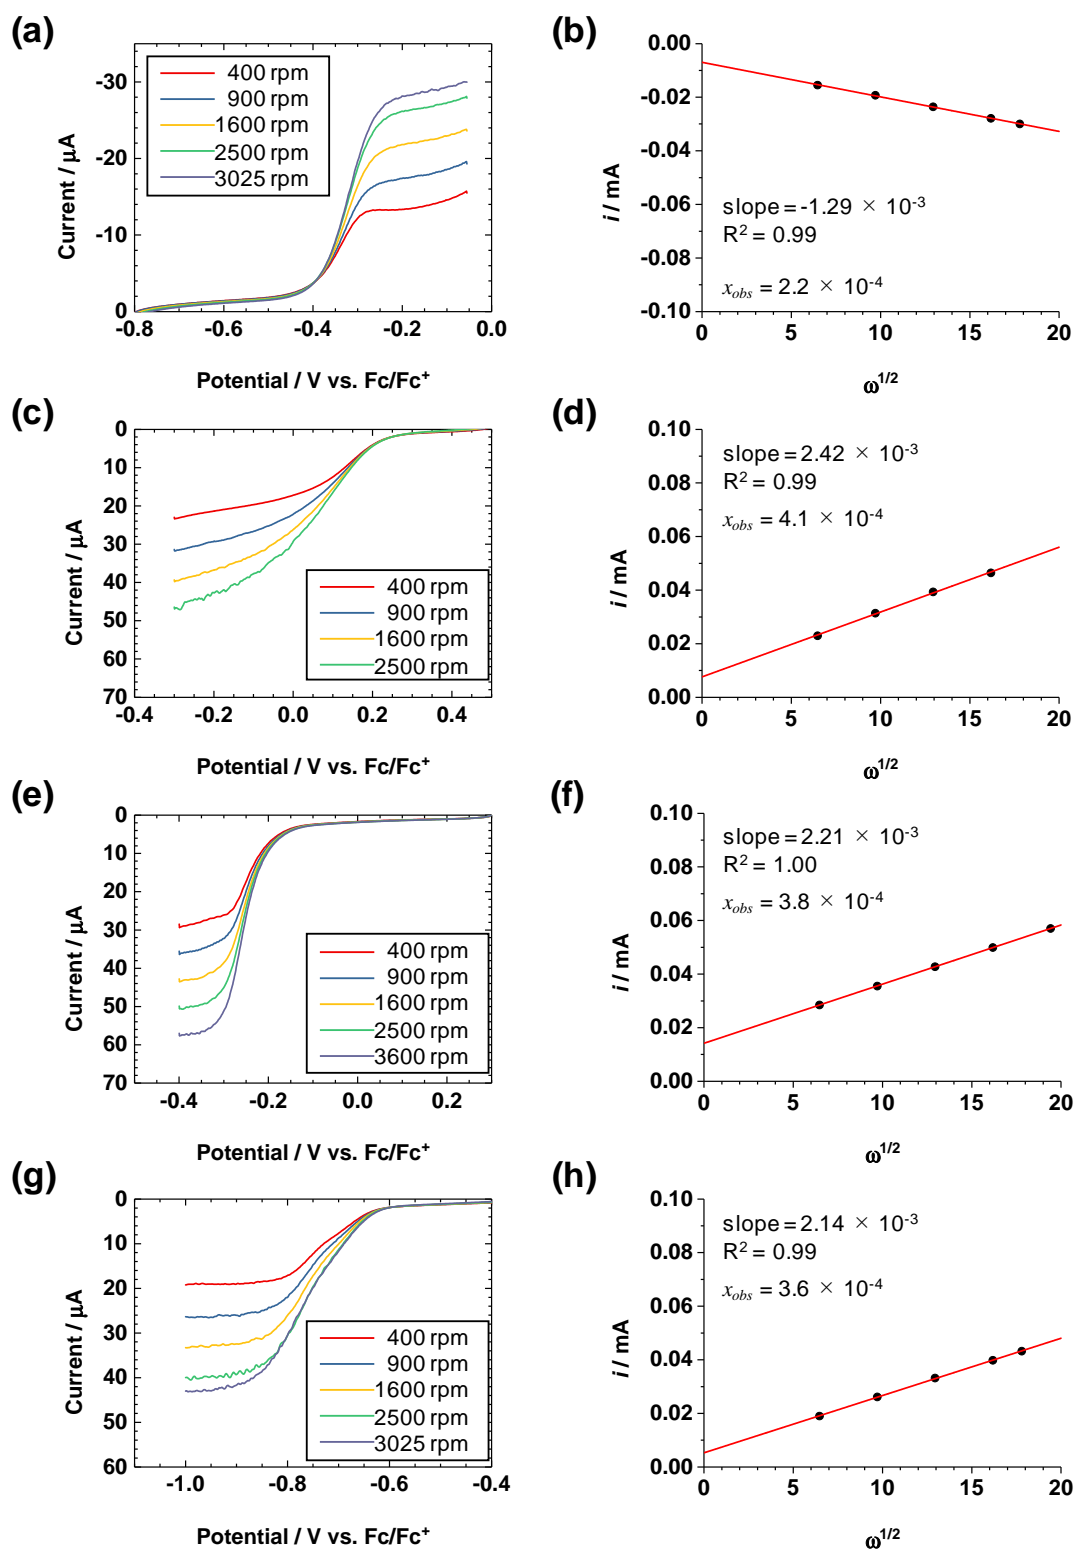

**Figure S1.** (a,b) LSVs of 0.5 mM  $[\text{Ni}^{\text{II}}(\text{qdt})_2]^{2-}$  in DMF and the plots of the limiting current versus  $\omega^{1/2}$ . (c,d) LSVs of 0.5 mM  $[\text{Fe}^{\text{III}}(\text{CN})_6]^{3-}$  in water and the plots of the limiting current versus  $\omega^{1/2}$ . (e,f) LSVs of 0.5 mM Methylene Blue in water and the plots of the limiting current versus  $\omega^{1/2}$ . (g,h) LSVs of 0.5 mM Methylene Blue in DMF and the plots of the limiting current versus  $\omega^{1/2}$ .

## Determination of the Gibbs free energy of activation ( $\Delta G^\ddagger_{\text{exp}}$ )

The Gibbs free energy of activation ( $\Delta G^\ddagger_{\text{exp}}$ ) of  $[\text{Ni}^{\text{II}}(\text{dcpdt})_2]^{2-}$  was determined by using following eq. 4 (Eyring-Polanyi equation),<sup>25</sup>

$$k = \frac{\kappa k_B T}{h} \exp\left(-\frac{\Delta G^\ddagger}{RT}\right) \quad (4)$$

where  $k$  is the reaction rate constant ( $= k_{\text{obs}}$ ),  $\kappa$  is the transmission coefficient ( $\approx 1$ ),  $k_B$  is the Boltzmann's constant ( $= 1.380 \times 10^{-23}$  [J K<sup>-1</sup>]),  $T$  is the absolute temperature (298 [K]),  $h$  is the Plank's constant ( $6.626 \times 10^{-34}$  [J s]) and  $R$  is the gas constant (8.314 [J K<sup>-1</sup> mol<sup>-1</sup>]).

The  $\Delta G^\ddagger_{\text{exp}}$  can be calculated as 16.0, 16.3 and 17.0 kcal mol<sup>-1</sup> at pH = 4, 5 and 6, respectively.

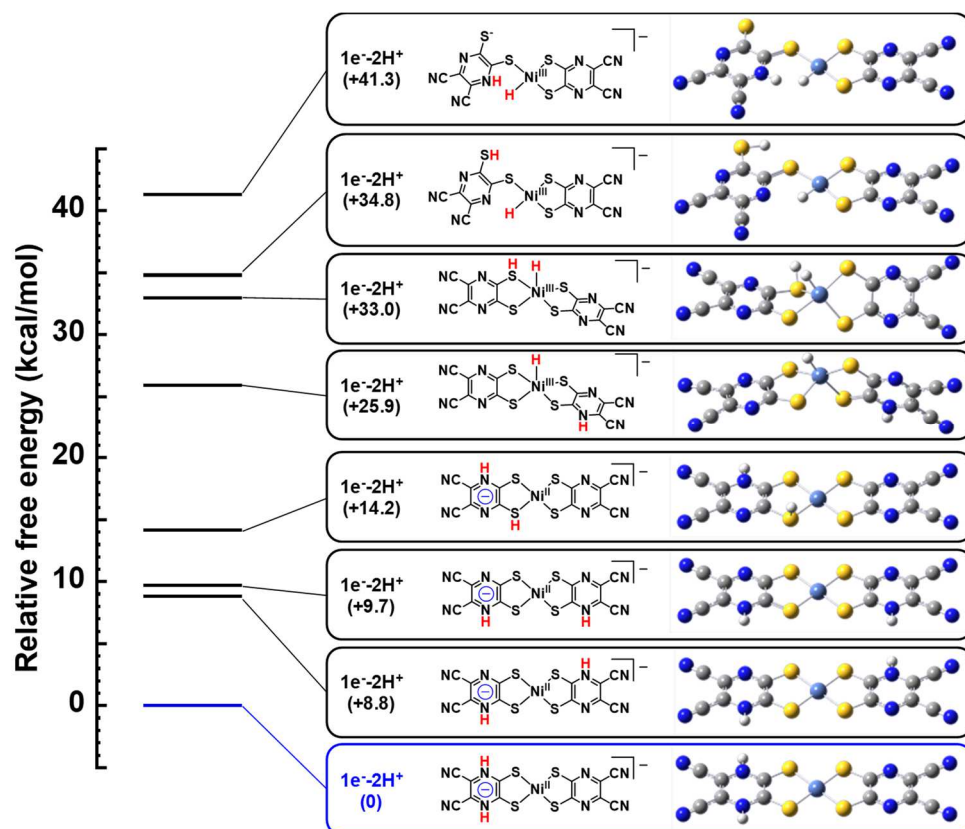

Figure S2. Comparison of free energies for some relevant tautomers computed for the  $1e^{-}2H^{+}$  product.

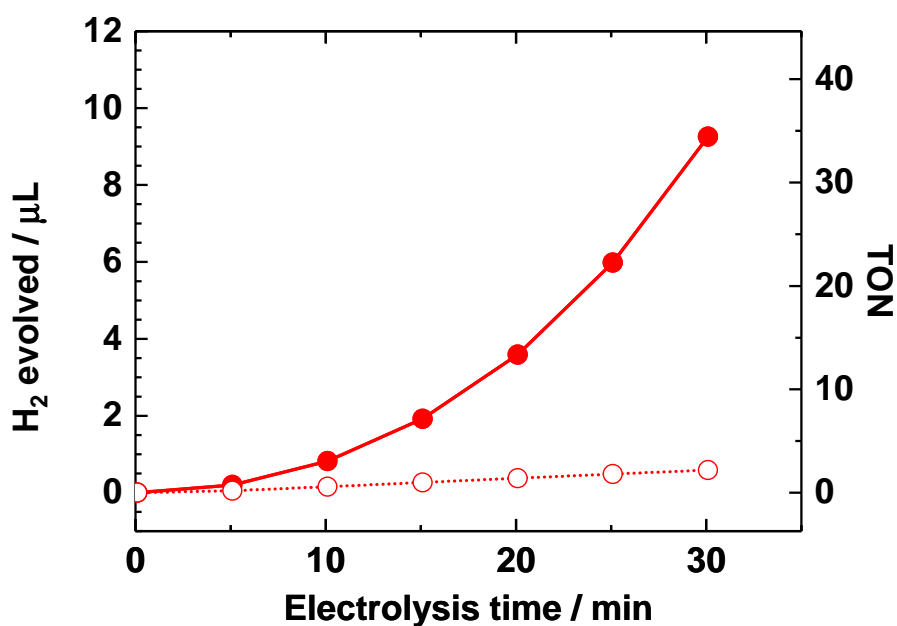

**Figure S3.** Electrochemical H<sub>2</sub> evolution catalyzed by Na<sub>2</sub>[Ni<sup>II</sup>(dcpdt)<sub>2</sub>]•4H<sub>2</sub>O (1 μM) during the controlled potential electrolysis at -1.3 V vs. SCE in an aqueous borate buffer solution (0.1 M; pH 9.0, 12 mL) containing NaCl (0.1 M) under Ar atmosphere. The working, counter, and reference electrodes were a GC rod, a Pt plate, and a SCE, respectively. Applied overpotential = 0.52 V. The results clearly indicate that [Ni<sup>II</sup>(dcpdt)<sub>2</sub>]<sup>2-</sup> is an active catalyst for HER even at pH =9.0. The gradual raise in the H<sub>2</sub> evolution rate during the electrolysis is attributable to the gradual deposition of the catalyst itself, as previously reported.<sup>17</sup> As discussed in the report,<sup>17</sup> this catalyst tends to be absorbed over the GC surfaces even by simple dipping of the catalyst solution without electrolysis. We also reported that the absorbed species preserve the NiS<sub>4</sub> core based on the energy dispersive X-ray fluorescence spectroscopy (see ref. 17).

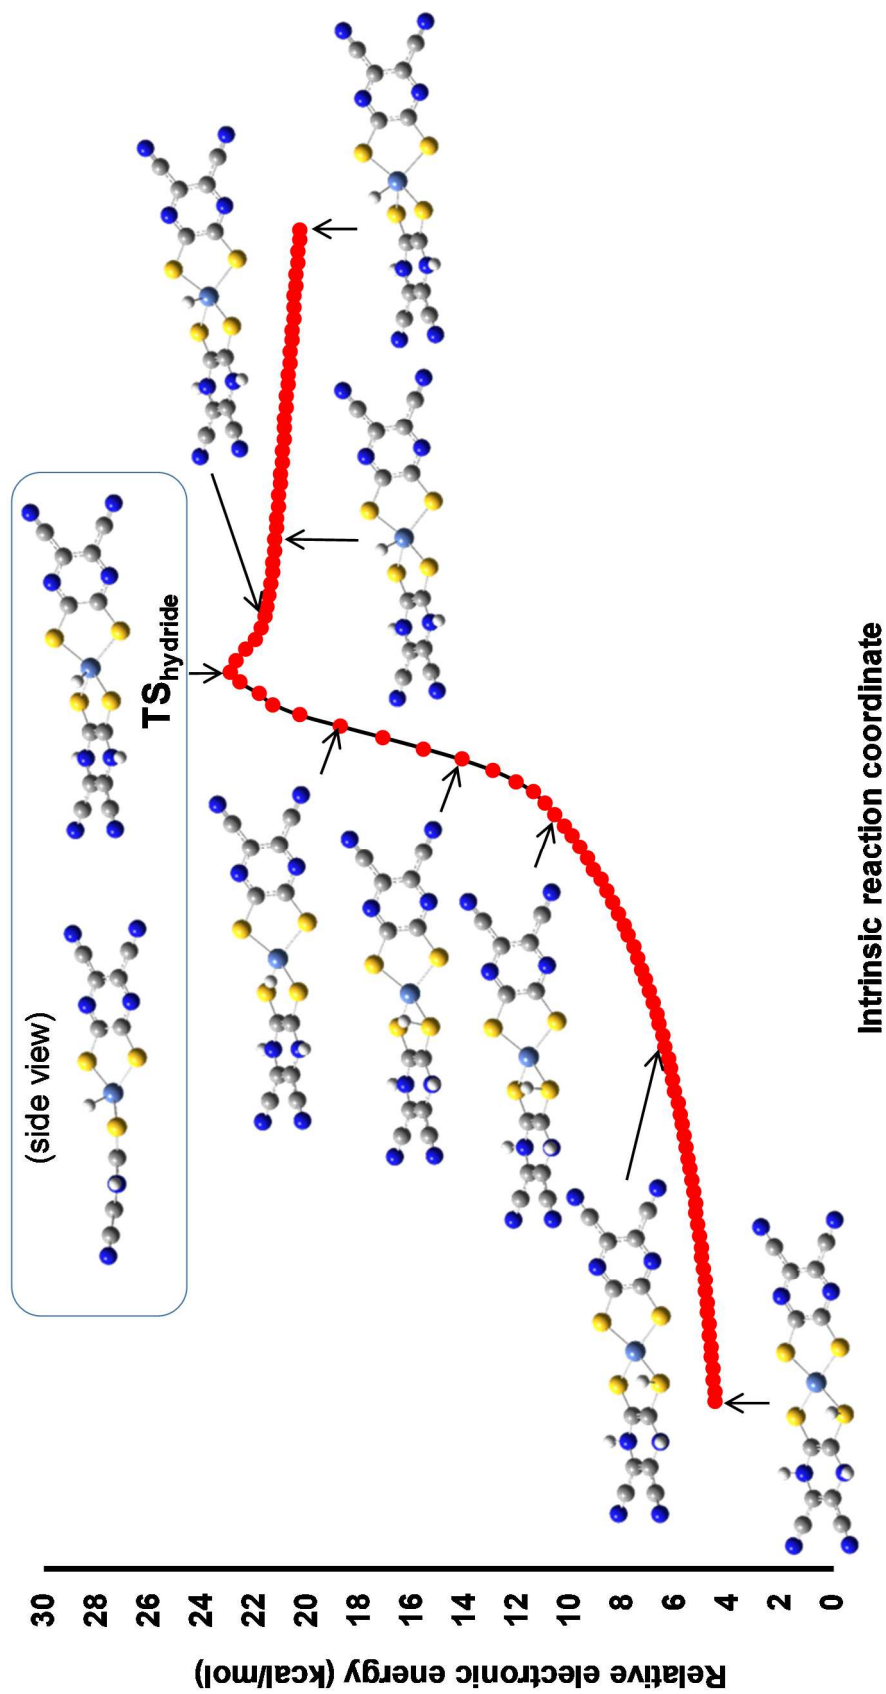

**Figure S4.** IRC (open-shell singlet) for the transition state of the hydride formation process ( $TS_{\text{hydride}}$ ;  $2e^-3H^+$ , +16.6), carried out at UB3P86 level of DFT using the 6-311+G(2d,p) basis set with solvation in water taken into consideration (C-PCM). In this figure, we adopted relative electronic energy to that of the most stable second PCET product ( $2e^-3H^+$ , 0; Figure 3a), rather than its relative Gibbs free energy.



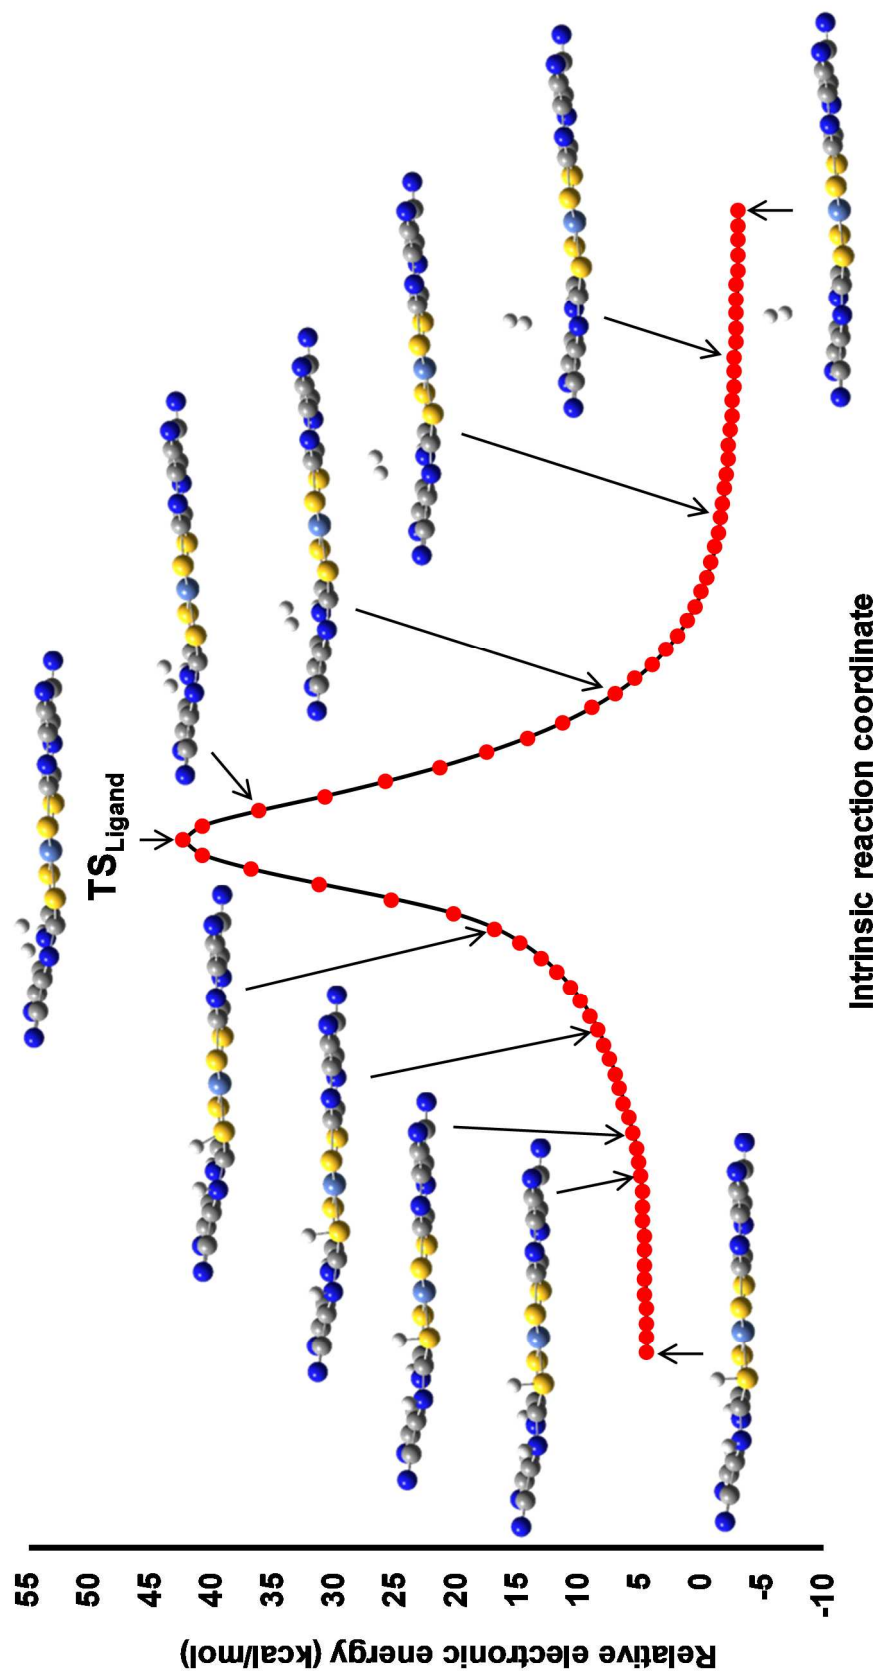

**Figure S5.** IRC (closed-shell singlet) for the transition state of the ligand-centered H<sub>2</sub> elimination process ( $\text{TS}_{\text{Ligand}}$ ;  $2e^-3H^+$ , +36.8), carried out at B3P86 level of DFT using the 6-311+G(2d,p) basis set with solvation in water taken into consideration (C-PCM). In this figure, we adopted relative electronic energy to that of the most stable second PCET product ( $2e^-3H^+$ , 0; Figure 3a), rather than its relative Gibbs free energy.

**Table S2.** Geometry optimized for  $[\text{Ni}^{\text{II}}(\text{dcpdt})_2]^{2-}$  ( $0e^-0H^+$ ) in its closed-shell singlet state. Optimized at B3P86 level of DFT using the 6-311+G(2d,p) basis set with solvation in water taken into consideration (C-PCM).<sup>a</sup>

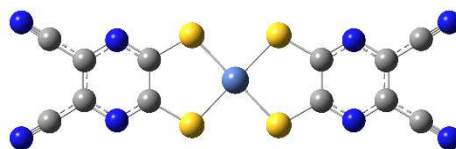

| Atom | X           | Y           | Z           |
|------|-------------|-------------|-------------|
| N    | 4.16201839  | 1.39926537  | 0.001156    |
| C    | 3.02635116  | 0.72055473  | 0.00053835  |
| C    | 5.3031352   | 0.6965148   | 0.00062786  |
| C    | 3.0263529   | -0.72055663 | -0.00054195 |
| C    | 5.30313662  | -0.69651177 | -0.00061863 |
| N    | 4.16202124  | -1.39926459 | -0.00115349 |
| S    | 1.52775865  | -1.56629845 | -0.00108059 |
| S    | 1.52775633  | 1.56629378  | 0.0010678   |
| N    | -4.16201932 | 1.39926525  | -0.00115267 |
| C    | -3.02635258 | 0.7205543   | -0.00054087 |
| C    | -5.3031362  | 0.69651479  | -0.00061942 |
| C    | -3.02635366 | -0.72055541 | 0.00053925  |
| C    | -5.30313726 | -0.69651176 | 0.00062567  |
| N    | -4.16202162 | -1.39926436 | 0.00115501  |
| S    | -1.52775918 | -1.56629436 | 0.00107176  |
| S    | -1.52775677 | 1.56629047  | -0.00107866 |
| Ni   | 0.00000248  | -0.00000306 | -0.00000492 |
| C    | -6.52612637 | 1.43394859  | -0.00139535 |
| N    | -7.51841039 | 2.0213934   | -0.002024   |
| C    | -6.52612891 | -1.43394295 | 0.00140512  |
| N    | -7.51841446 | -2.02138506 | 0.00203659  |
| C    | 6.52612832  | -1.43394254 | -0.00139506 |
| N    | 7.51841388  | -2.02138461 | -0.00202412 |
| C    | 6.52612515  | 1.43394896  | 0.00140926  |
| N    | 7.51840938  | 2.02139346  | 0.00204204  |

<sup>a</sup>Part of the Gaussian output file

SCF Done: E(UB3P86) = -4001.23783806 A.U. after 1 cycles

|                | 1       | 2       | 3       |
|----------------|---------|---------|---------|
|                | A       | A       | A       |
| Frequencies -- | 12.8334 | 15.5958 | 41.2618 |
| Red. masses -- | 15.0762 | 17.7348 | 20.7191 |

|                                              |                             |
|----------------------------------------------|-----------------------------|
| Zero-point correction=                       | 0.110920 (Hartree/Particle) |
| Thermal correction to Energy=                | 0.133738                    |
| Thermal correction to Enthalpy=              | 0.134682                    |
| Thermal correction to Gibbs Free Energy=     | 0.054614                    |
| Sum of electronic and zero-point Energies=   | -4001.126918                |
| Sum of electronic and thermal Energies=      | -4001.104100                |
| Sum of electronic and thermal Enthalpies=    | -4001.103156                |
| Sum of electronic and thermal Free Energies= | -4001.183224                |

| Item          | Value    | Threshold | Converged? |
|---------------|----------|-----------|------------|
| Maximum Force | 0.000002 | 0.000450  | YES        |
| RMS Force     | 0.000001 | 0.000300  | YES        |

**Table S3.** Geometry optimized for  $[\text{Ni}^{\text{II}}(\text{dcpdt})(\text{dcpdtH})]^-$  ( $0\text{e}^- - 1\text{H}^+$ ) in its closed-shell singlet state. Optimized at B3P86 level of DFT using the 6-311+G(2d,p) basis set with solvation in water taken into consideration (C-PCM).<sup>a</sup>

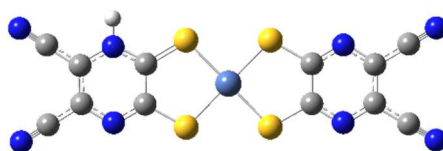

| Atom | X           | Y           | Z           |
|------|-------------|-------------|-------------|
| N    | 4.17855406  | -1.39671462 | 0.00000228  |
| C    | 3.04354534  | -0.71939347 | -0.00001168 |
| C    | 5.31716019  | -0.69248938 | 0.00002248  |
| C    | 3.04022244  | 0.71703228  | 0.00001589  |
| C    | 5.31375377  | 0.70172441  | 0.00001814  |
| N    | 4.17163942  | 1.40014623  | 0.00002045  |
| S    | 1.53817292  | 1.56051074  | 0.00004472  |
| S    | 1.5449314   | -1.56791373 | -0.00006487 |
| N    | -4.14452298 | -1.33327228 | 0.00000549  |
| C    | -2.95382588 | -0.71221702 | -0.00003537 |
| C    | -5.33473041 | -0.65999423 | 0.00003752  |
| C    | -2.98528263 | 0.73825141  | -0.00001549 |
| C    | -5.27989919 | 0.7188747   | -0.00000296 |
| N    | -4.12726969 | 1.40514492  | -0.00002462 |
| H    | -4.15757455 | -2.34865519 | -0.00000209 |
| S    | -1.49977687 | 1.57092529  | 0.00002089  |
| S    | -1.51103221 | -1.56981534 | -0.00011231 |
| Ni   | 0.0254589   | -0.00223643 | -0.00002798 |
| C    | -6.53868427 | -1.39754445 | 0.00012019  |
| N    | -7.52664116 | -1.99232016 | 0.00018824  |
| C    | -6.49166386 | 1.47922142  | -0.0000309  |
| N    | -7.46505196 | 2.09373452  | -0.00005508 |
| C    | 6.53511148  | 1.44288871  | 0.00000982  |
| N    | 7.52595762  | 2.03196684  | 0.00000535  |
| C    | 6.54220473  | -1.42754408 | 0.00005092  |
| N    | 7.53598198  | -2.01167086 | 0.00007205  |

<sup>a</sup>Part of the Gaussian output file

SCF Done: E(RB3P86) = -4001.67221070 A.U. after 13 cycles

|                | 1       | 2       | 3       |
|----------------|---------|---------|---------|
|                | A       | A       | A       |
| Frequencies -- | 14.8280 | 17.4957 | 45.4985 |
| Red. masses -- | 17.0183 | 13.6229 | 16.9176 |

|                                              |                             |
|----------------------------------------------|-----------------------------|
| Zero-point correction=                       | 0.124120 (Hartree/Particle) |
| Thermal correction to Energy=                | 0.147104                    |
| Thermal correction to Enthalpy=              | 0.148049                    |
| Thermal correction to Gibbs Free Energy=     | 0.068304                    |
| Sum of electronic and zero-point Energies=   | -4001.548099                |
| Sum of electronic and thermal Energies=      | -4001.525114                |
| Sum of electronic and thermal Enthalpies=    | -4001.524170                |
| Sum of electronic and thermal Free Energies= | -4001.603915                |

| Item          | Value    | Threshold | Converged? |
|---------------|----------|-----------|------------|
| Maximum Force | 0.000069 | 0.000450  | YES        |
| RMS Force     | 0.000017 | 0.000300  | YES        |

**Table S4.** Geometry optimized for  $[\text{Ni}^{\text{II}}(\text{dcpdtH})_2] (\mathbf{0e}^- \cdot 2\mathbf{H}^+)$  in its closed-shell singlet state. Optimized at B3P86 level of DFT using the 6-311+G(2d,p) basis set with solvation in water taken into consideration (C-PCM).<sup>a</sup>

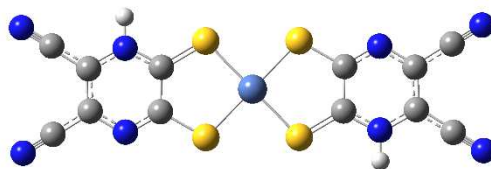

| Atom | X         | Y         | Z         |
|------|-----------|-----------|-----------|
| N    | -4.159449 | 1.334338  | -0.000386 |
| C    | -2.971839 | 0.711567  | -0.000071 |
| C    | -5.349092 | 0.664743  | -0.000336 |
| C    | -3.005958 | -0.735673 | 0.000219  |
| C    | -5.298425 | -0.714984 | 0.000100  |
| N    | -4.145725 | -1.400304 | 0.000356  |
| S    | -1.521127 | -1.574526 | 0.000390  |
| S    | -1.525538 | 1.567604  | 0.000001  |
| N    | 4.159449  | -1.334338 | -0.000166 |
| C    | 2.971839  | -0.711567 | 0.000017  |
| C    | 5.349092  | -0.664743 | -0.000221 |
| C    | 3.005958  | 0.735673  | 0.000081  |
| C    | 5.298425  | 0.714984  | -0.000063 |
| N    | 4.145725  | 1.400304  | 0.000075  |
| H    | 4.171822  | -2.350448 | -0.000247 |
| S    | 1.521127  | 1.574526  | 0.000174  |
| S    | 1.525538  | -1.567604 | 0.000176  |
| Ni   | 0.000000  | 0.000000  | 0.000198  |
| C    | 6.551687  | -1.406380 | -0.000439 |
| N    | 7.538393  | -2.002054 | -0.000620 |
| C    | 6.510779  | 1.474158  | -0.000036 |
| N    | 7.485113  | 2.086609  | -0.000008 |
| C    | -6.510779 | -1.474158 | 0.000311  |
| N    | -7.485113 | -2.086608 | 0.000489  |
| C    | -6.551687 | 1.406380  | -0.000746 |

|   |           |          |           |
|---|-----------|----------|-----------|
| N | -7.538393 | 2.002054 | -0.001084 |
| H | -4.171822 | 2.350448 | -0.000638 |

<sup>a</sup>Part of the Gaussian output file

SCF Done: E(RB3P86) = -4002.10088708 A.U. after 2 cycles

|                |         |         |         |
|----------------|---------|---------|---------|
|                | 1       | 2       | 3       |
|                | A       | A       | A       |
| Frequencies -- | 13.0903 | 16.3776 | 45.0379 |
| Red. masses -- | 14.0558 | 14.9843 | 16.4957 |

|                                              |                             |
|----------------------------------------------|-----------------------------|
| Zero-point correction=                       | 0.137376 (Hartree/Particle) |
| Thermal correction to Energy=                | 0.160572                    |
| Thermal correction to Enthalpy=              | 0.161516                    |
| Thermal correction to Gibbs Free Energy=     | 0.081326                    |
| Sum of electronic and zero-point Energies=   | -4001.963511                |
| Sum of electronic and thermal Energies=      | -4001.940315                |
| Sum of electronic and thermal Enthalpies=    | -4001.939371                |
| Sum of electronic and thermal Free Energies= | -4002.019561                |

| Item          | Value    | Threshold | Converged? |
|---------------|----------|-----------|------------|
| Maximum Force | 0.000125 | 0.000450  | YES        |
| RMS Force     | 0.000038 | 0.000300  | YES        |

**Table S5.** Geometry optimized for  $[\text{Ni}^{\text{II}}(\text{dcpdt})(\text{dcpdtH})]^{2-}$  ( $1e^-1\text{H}^+$ ) in its doublet state. Optimized at UB3P86 level of DFT using the 6-311+G(2d,p) basis set with solvation in water taken into consideration (C-PCM).<sup>a</sup>

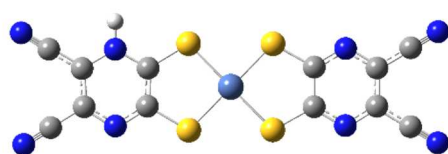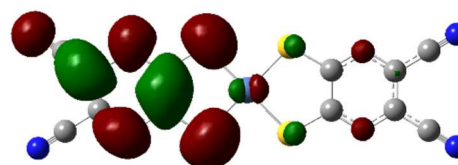

SOMO

| Atom | X           | Y           | Z           | Mulliken<br>spin densities |
|------|-------------|-------------|-------------|----------------------------|
| N    | -4.19573626 | -1.39761202 | 0.00668871  | 0.006878                   |
| C    | -3.05806655 | -0.7215367  | 0.00275211  | -0.000866                  |
| C    | -5.33525281 | -0.69086362 | 0.00385241  | 0.000786                   |
| C    | -3.05427394 | 0.71995374  | -0.00403898 | -0.001262                  |
| C    | -5.33146311 | 0.7017383   | -0.00344648 | 0.000217                   |
| N    | -4.18833212 | 1.40228066  | -0.00719819 | 0.007016                   |
| S    | -1.5533683  | 1.56070842  | -0.00848883 | -0.004731                  |
| S    | -1.56091631 | -1.5683953  | 0.00604132  | -0.003642                  |
| N    | 4.16683002  | -1.36836381 | -0.00621146 | 0.25409                    |
| C    | 2.97384243  | -0.68565279 | -0.00285032 | 0.164459                   |
| C    | 5.37236968  | -0.67038054 | -0.00292813 | 0.238422                   |
| C    | 3.00137961  | 0.69937854  | 0.00370376  | 0.126876                   |
| C    | 5.29202173  | 0.72145628  | 0.00377702  | -0.095141                  |
| N    | 4.162565    | 1.41919246  | 0.00712747  | 0.16656                    |
| H    | 4.16459278  | -2.37707738 | -0.00982294 | -0.016408                  |
| S    | 1.4955915   | 1.57210084  | 0.00833187  | 0.065739                   |
| S    | 1.50543362  | -1.57288568 | -0.00720405 | 0.04809                    |
| Ni   | -0.02737237 | -0.00249689 | -0.00029896 | -0.00037                   |
| C    | 6.57973917  | -1.37398236 | -0.00690372 | -0.049027                  |
| N    | 7.5777537   | -1.96696636 | -0.01023704 | 0.115038                   |
| C    | 6.51120881  | 1.47681067  | 0.00756376  | 0.001744                   |
| N    | 7.48620058  | 2.09116558  | 0.01067712  | -0.025468                  |
| C    | -6.55262015 | 1.44190254  | -0.00727704 | -0.000192                  |



|   |             |             |             |           |
|---|-------------|-------------|-------------|-----------|
| N | -7.54338522 | 2.0321086   | -0.01032959 | 0.000622  |
| C | -6.56027571 | -1.4244539  | 0.00870104  | -0.000281 |
| N | -7.55413414 | -2.00947415 | 0.01260811  | 0.00085   |

<sup>a</sup>Part of the Gaussian output file

SCF Done: E(UB3P86) = -4001.83057302 A.U. after 2 cycles

Annihilation of the first spin contaminant:

S\*\*2 before annihilation 0.7612, after 0.7501

|                |         |         |         |
|----------------|---------|---------|---------|
|                | 1       | 2       | 3       |
|                | A       | A       | A       |
| Frequencies -- | 9.2678  | 17.1438 | 36.4141 |
| Red. masses -- | 15.4405 | 17.5246 | 19.0598 |

|                                              |                             |
|----------------------------------------------|-----------------------------|
| Zero-point correction=                       | 0.121029 (Hartree/Particle) |
| Thermal correction to Energy=                | 0.144769                    |
| Thermal correction to Enthalpy=              | 0.145713                    |
| Thermal correction to Gibbs Free Energy=     | 0.062970                    |
| Sum of electronic and zero-point Energies=   | -4001.709544                |
| Sum of electronic and thermal Energies=      | -4001.685804                |
| Sum of electronic and thermal Enthalpies=    | -4001.684860                |
| Sum of electronic and thermal Free Energies= | -4001.767603                |

| Item          | Value    | Threshold | Converged? |
|---------------|----------|-----------|------------|
| Maximum Force | 0.000005 | 0.000450  | YES        |
| RMS Force     | 0.000002 | 0.000300  | YES        |

**Table S6.** Geometry optimized for  $[\text{Ni}^{\text{II}}(\text{dcpdt})(\text{dcpdtH}_2)]^-$  (**1e-2H<sup>+</sup>(0)**) in its doublet state. Optimized at UB3P86 level of DFT using the 6-311+G(2d,p) basis set with solvation in water taken into consideration (C-PCM).<sup>a</sup>

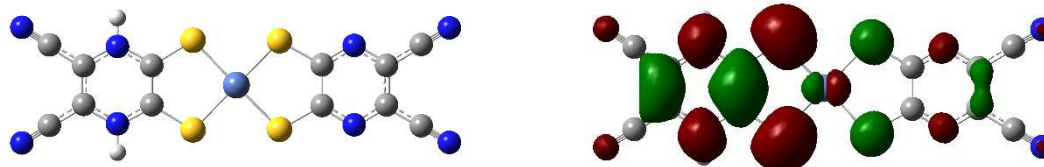

SOMO

| Atom | X           | Y           | Z           | Mulliken spin densities |
|------|-------------|-------------|-------------|-------------------------|
| N    | 4.20711075  | 1.39906659  | -0.0004725  | 0.008573                |
| C    | 3.07350127  | 0.71885697  | -0.00024671 | -0.002234               |
| C    | 5.34790084  | 0.6967829   | -0.00022087 | 0.000674                |
| C    | 3.07349807  | -0.71885283 | 0.00021919  | -0.002234               |
| C    | 5.34789756  | -0.69678926 | 0.00028204  | 0.000674                |
| N    | 4.20710458  | -1.39906768 | 0.00048764  | 0.008573                |
| S    | 1.57280539  | -1.56263572 | 0.00043722  | -0.00179                |
| S    | 1.5728113   | 1.56264577  | -0.00052151 | -0.00179                |
| N    | -4.14176714 | 1.36388817  | -0.00003355 | 0.1832                  |
| C    | -2.93272891 | 0.69305619  | -0.00004326 | 0.202838                |
| C    | -5.33483805 | 0.68206209  | 0.00001763  | 0.01158                 |
| C    | -2.93272574 | -0.69305642 | 0.00000425  | 0.202838                |
| C    | -5.33483514 | -0.68207124 | 0.00005445  | 0.01158                 |
| N    | -4.14176144 | -1.36389282 | 0.00004454  | 0.1832                  |
| S    | -1.47793919 | -1.58047118 | 0.0000024   | 0.109972                |
| S    | -1.4779459  | 1.58047956  | -0.00008339 | 0.109972                |
| Ni   | 0.05226924  | 0.00000726  | -0.00004735 | 0.004703                |
| C    | -6.54183595 | 1.42006044  | 0.00002086  | -0.007571               |
| N    | -7.51525374 | 2.03779457  | 0.00002768  | 0.005157                |
| C    | -6.54183097 | -1.4200731  | 0.00008892  | -0.007571               |
| N    | -7.51524818 | -2.03780822 | 0.00011267  | 0.005157                |
| C    | 6.57105045  | -1.43450466 | 0.00060299  | -0.000296               |
| N    | 7.5633042   | -2.02152107 | 0.00085877  | 0.001041                |
| C    | 6.57105764  | 1.43449172  | -0.0004926  | -0.000296               |

|   |             |             |             |           |
|---|-------------|-------------|-------------|-----------|
| N | 7.56331504  | 2.02150183  | -0.00070836 | 0.001041  |
| H | -4.14177405 | 2.37409819  | -0.00005003 | -0.013495 |
| H | -4.14176494 | -2.37410257 | 0.00008097  | -0.013495 |

<sup>a</sup>Part of the Gaussian output file

SCF Done: E(UB3P86) = -4002.28276955 A.U. after 2 cycles

Annihilation of the first spin contaminant:

S\*\*2 before annihilation 0.7540, after 0.7500

|                |         |         |         |
|----------------|---------|---------|---------|
|                | 1       | 2       | 3       |
|                | A       | A       | A       |
| Frequencies -- | 15.2397 | 16.6528 | 42.2517 |
| Red. masses -- | 13.1926 | 17.5239 | 15.9978 |

Zero-point correction= 0.134555 (Hartree/Particle)  
 Thermal correction to Energy= 0.158494  
 Thermal correction to Enthalpy= 0.159438  
 Thermal correction to Gibbs Free Energy= 0.077074  
 Sum of electronic and zero-point Energies= -4002.148214  
 Sum of electronic and thermal Energies= -4002.124276  
 Sum of electronic and thermal Enthalpies= -4002.123331  
 Sum of electronic and thermal Free Energies= -4002.205695

| Item          | Value    | Threshold | Converged? |
|---------------|----------|-----------|------------|
| Maximum Force | 0.000306 | 0.000450  | YES        |
| RMS Force     | 0.000036 | 0.000300  | YES        |

**Table S7.** Geometry optimized for  $[\text{Ni}^{\text{II}}(\text{dcpdtH})(\text{dcpdtH}_2)] (\mathbf{1e}^- \cdot \mathbf{3H}^+)$  in its doublet state. Optimized at UB3P86 level of DFT using the 6-311+G(2d,p) basis set with solvation in water taken into consideration (C-PCM).<sup>a</sup>

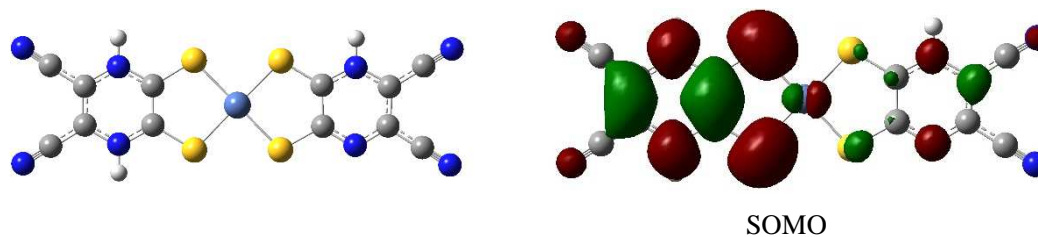

| Atom | X           | Y           | Z           | Mulliken spin densities |
|------|-------------|-------------|-------------|-------------------------|
| N    | 4.19304189  | 1.33342363  | -0.00007844 | 0.021573                |
| C    | 3.0025758   | 0.7130076   | 0.00002564  | 0.00647                 |
| C    | 5.38144316  | 0.65790775  | -0.00006294 | 0.022111                |
| C    | 3.03216862  | -0.73385506 | 0.00014662  | -0.002342               |
| C    | 5.32473748  | -0.72124685 | 0.00008059  | -0.009065               |
| N    | 4.17047423  | -1.40446271 | 0.00018212  | 0.031321                |
| S    | 1.54376163  | -1.56518426 | 0.00023602  | -0.017526               |
| S    | 1.55773483  | 1.57020944  | 0.00001297  | -0.015791               |
| N    | -4.16032909 | 1.36053551  | -0.00017265 | 0.192379                |
| C    | -2.95256846 | 0.69470651  | -0.00005596 | 0.2004                  |
| C    | -5.3507802  | 0.67523172  | -0.00019999 | 0.015281                |
| C    | -2.94791835 | -0.69114995 | 0.00001648  | 0.197253                |
| C    | -5.3459849  | -0.68895731 | -0.00011753 | 0.016082                |
| N    | -4.15064784 | -1.36576935 | -0.00002154 | 0.19253                 |
| S    | -1.48699162 | -1.57051554 | 0.00014099  | 0.089404                |
| S    | -1.49780472 | 1.58307887  | -0.00001083 | 0.089422                |
| Ni   | 0.02668774  | 0.00578471  | 0.00010644  | 0.000696                |
| C    | -6.56006568 | 1.41019332  | -0.00030947 | -0.00857                |
| N    | -7.535684   | 2.02374719  | -0.00040091 | 0.006449                |
| C    | -6.54984187 | -1.43272412 | -0.00011094 | -0.008763               |
| N    | -7.52086265 | -2.0535362  | -0.00010344 | 0.006857                |
| C    | 6.53493817  | -1.48406864 | 0.00013583  | 0.000592                |
| N    | 7.50716765  | -2.10014831 | 0.00018237  | -0.00183                |
| C    | 6.58707314  | 1.39345507  | -0.00018418 | -0.004899               |

|   |             |            |             |           |
|---|-------------|------------|-------------|-----------|
| N | 7.57616908  | 1.98589013 | -0.00028186 | 0.008575  |
| H | -4.16482696 | 2.37136157 | -0.0002355  | -0.013719 |
| H | -4.14818004 | -2.3766012 | 0.00002857  | -0.013723 |
| H | 4.20858168  | 2.34909216 | -0.00016434 | -0.00117  |

<sup>a</sup>Part of the Gaussian output file

SCF Done: E(UB3P86) = -4002.71358609 A.U. after 2 cycles

Annihilation of the first spin contaminant:

S\*\*2 before annihilation 0.7555, after 0.7500

|                | 1       | 2       | 3       |
|----------------|---------|---------|---------|
|                | A       | A       | A       |
| Frequencies -- | 16.7701 | 18.5533 | 44.6575 |
| Red. masses -- | 16.4867 | 12.5156 | 16.1034 |

Zero-point correction= 0.147944 (Hartree/Particle)  
 Thermal correction to Energy= 0.171958  
 Thermal correction to Enthalpy= 0.172902  
 Thermal correction to Gibbs Free Energy= 0.090891  
 Sum of electronic and zero-point Energies= -4002.565642  
 Sum of electronic and thermal Energies= -4002.541628  
 Sum of electronic and thermal Enthalpies= -4002.540684  
 Sum of electronic and thermal Free Energies= -4002.622696

| Item          | Value    | Threshold | Converged? |
|---------------|----------|-----------|------------|
| Maximum Force | 0.000397 | 0.000450  | YES        |
| RMS Force     | 0.000045 | 0.000300  | YES        |

**Table S8.** Geometry optimized for  $[\text{Ni}^{\text{II}}(\text{dcpdt})(\text{dcpdtH}_2)]^{2-}$  ( $2e^- - 2\text{H}^+$ ) in its closed-shell singlet state. Optimized at B3P86 level of DFT using the 6-311+G(2d,p) basis set with solvation in water taken into consideration (C-PCM).<sup>a</sup>

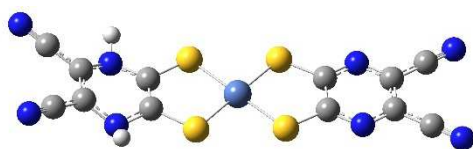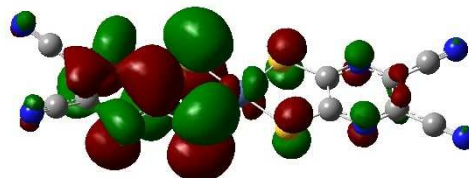

HOMO

| Atom | X           | Y           | Z           |
|------|-------------|-------------|-------------|
| N    | 4.22171705  | 1.3995274   | 0.05825868  |
| C    | 3.08517272  | 0.72083202  | 0.02917011  |
| C    | 5.36332043  | 0.69541547  | 0.02971879  |
| C    | 3.08516878  | -0.72083339 | -0.02914795 |
| C    | 5.36331657  | -0.69542473 | -0.02982002 |
| N    | 4.22170899  | -1.39953271 | -0.05829669 |
| S    | 1.58606066  | -1.56214823 | -0.06324715 |
| S    | 1.58607004  | 1.56215211  | 0.06334488  |
| N    | -4.16968301 | 1.43250714  | 0.02967998  |
| C    | -2.95946443 | 0.6679606   | -0.00315522 |
| C    | -5.33959895 | 0.68032099  | -0.02245638 |
| C    | -2.9594842  | -0.66795759 | 0.00332482  |
| C    | -5.33958016 | -0.68032475 | 0.02236335  |
| N    | -4.16965831 | -1.4324852  | -0.0296165  |
| S    | -1.47420545 | -1.57879962 | 0.02087152  |
| S    | -1.47419998 | 1.5788162   | -0.02071677 |
| Ni   | 0.0520283   | 0.00000577  | 0.00006876  |
| C    | -6.56410044 | 1.39302491  | -0.08091999 |
| N    | -7.54336607 | 2.00169203  | -0.13443478 |
| C    | -6.56407758 | -1.39304943 | 0.08069393  |
| N    | -7.54334067 | -2.0017302  | 0.13410973  |
| C    | 6.58652131  | -1.43079249 | -0.06355835 |
| N    | 7.57892376  | -2.01799371 | -0.0908794  |
| C    | 6.58652952  | 1.43077935  | 0.06338831  |

|   |             |             |             |
|---|-------------|-------------|-------------|
| N | 7.57893519  | 2.01797762  | 0.09065315  |
| H | -4.16267769 | 2.22642727  | -0.60230701 |
| H | -4.16271908 | -2.22635832 | 0.60241476  |

<sup>a</sup>Part of the Gaussian output file

SCF Done: E(RB3P86) = -4002.44296328 A.U. after 2 cycles

|                |         |         |         |
|----------------|---------|---------|---------|
|                | 1       | 2       | 3       |
|                | A       | A       | A       |
| Frequencies -- | 9.8623  | 30.2640 | 31.7783 |
| Red. masses -- | 13.0379 | 10.2934 | 12.8874 |

|                                              |                             |
|----------------------------------------------|-----------------------------|
| Zero-point correction=                       | 0.134005 (Hartree/Particle) |
| Thermal correction to Energy=                | 0.157875                    |
| Thermal correction to Enthalpy=              | 0.158819                    |
| Thermal correction to Gibbs Free Energy=     | 0.077225                    |
| Sum of electronic and zero-point Energies=   | -4002.308958                |
| Sum of electronic and thermal Energies=      | -4002.285089                |
| Sum of electronic and thermal Enthalpies=    | -4002.284144                |
| Sum of electronic and thermal Free Energies= | -4002.365738                |

| Item          | Value    | Threshold | Converged? |
|---------------|----------|-----------|------------|
| Maximum Force | 0.000017 | 0.000450  | YES        |
| RMS Force     | 0.000002 | 0.000300  | YES        |

**Table S9.** Geometry optimized for  $[\text{Ni}^{\text{II}}(\text{dcpdtH})(\text{dcpdtH}_2)]^-$  (**2e-3H<sup>+</sup>(0)**) in its closed-shell singlet state. Optimized at B3P86 level of DFT using the 6-311+G(2d,p) basis set with solvation in water taken into consideration (C-PCM).<sup>a</sup>

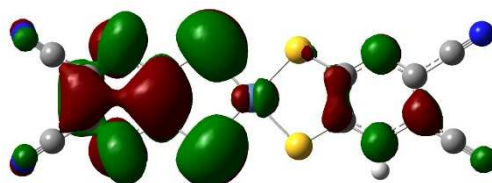

HOMO

| Atom | X          | Y          | Z          |
|------|------------|------------|------------|
| N    | -4.1598369 | -1.4087196 | 0.0766087  |
| C    | -3.0171245 | -0.7341009 | 0.0150886  |
| C    | -5.3080272 | -0.7175663 | 0.1379562  |
| C    | -2.9849709 | 0.7099531  | 0.0144288  |
| C    | -5.3664296 | 0.6607265  | 0.1415197  |
| N    | -4.1749062 | 1.3390459  | 0.0792733  |
| S    | -1.5391170 | 1.5613841  | -0.0625450 |
| S    | -1.5312359 | -1.5626849 | -0.0653690 |
| N    | 4.1971261  | -1.3991061 | -0.4053765 |
| C    | 2.9708306  | -0.6678970 | -0.3041654 |
| C    | 5.3213072  | -0.6839274 | 0.0096803  |
| C    | 2.9734766  | 0.6698684  | -0.3026357 |
| C    | 5.3241984  | 0.6751942  | 0.0108637  |
| N    | 4.2030328  | 1.3958636  | -0.4025049 |
| S    | 1.4967946  | 1.5783195  | -0.2367352 |
| S    | 1.4907736  | -1.5718910 | -0.2410815 |
| Ni   | -0.0114096 | 0.0012923  | -0.1466013 |
| C    | 6.4778681  | -1.4116933 | 0.3778341  |
| N    | 7.4030288  | -2.0356882 | 0.6732522  |
| C    | 6.4840752  | 1.3973141  | 0.3798371  |
| N    | 7.4121007  | 2.0168182  | 0.6756794  |
| C    | -6.5695586 | 1.3931415  | 0.2034283  |
| N    | -7.5568917 | 1.9888336  | 0.2541813  |
| C    | -6.5198200 | -1.4760207 | 0.2023602  |



|   |            |            |            |
|---|------------|------------|------------|
| N | -7.4918026 | -2.0910087 | 0.2543808  |
| H | 4.1414832  | -2.3354684 | -0.0223776 |
| H | 4.1514382  | 2.3319267  | -0.0183177 |
| H | -4.1868057 | 2.3530880  | 0.0815862  |

<sup>a</sup>Part of the Gaussian output file

SCF Done: E(RB3P86) = -4002.88204979 A.U. after 1 cycles

|                |         |         |         |
|----------------|---------|---------|---------|
|                | 1       | 2       | 3       |
|                | A       | A       | A       |
| Frequencies -- | 16.0838 | 17.0414 | 34.5841 |
| Red. masses -- | 13.5620 | 14.5331 | 9.8773  |

Zero-point correction= 0.146946 (Hartree/Particle)  
 Thermal correction to Energy= 0.171031  
 Thermal correction to Enthalpy= 0.171975  
 Thermal correction to Gibbs Free Energy= 0.089975  
 Sum of electronic and zero-point Energies= -4002.735104  
 Sum of electronic and thermal Energies= -4002.711019  
 Sum of electronic and thermal Enthalpies= -4002.710075  
 Sum of electronic and thermal Free Energies= -4002.792075

| Item          | Value    | Threshold | Converged? |
|---------------|----------|-----------|------------|
| Maximum Force | 0.000012 | 0.000450  | YES        |
| RMS Force     | 0.000002 | 0.000300  | YES        |

**Table S10.** Geometry optimized for  $2e^- \cdot 3H^+$  (+0.6) in its closed-shell singlet state. Optimized at B3P86 level of DFT using the 6-311+G(2d, p) basis set with solvation in water taken into consideration (C-PCM).<sup>a</sup>

| Atom | X          | Y          | Z          |
|------|------------|------------|------------|
| N    | 4.2002421  | 1.4110390  | 0.0950867  |
| C    | 3.0787824  | 0.7176348  | 0.0138745  |
| C    | 5.3491734  | 0.7229592  | 0.1260432  |
| C    | 3.0976821  | -0.7173936 | -0.0397759 |
| C    | 5.3678445  | -0.6693469 | 0.0722468  |
| N    | 4.2377513  | -1.3841285 | -0.0102052 |
| S    | 1.6092012  | -1.5759696 | -0.1569951 |
| S    | 1.5677190  | 1.5451108  | -0.0257174 |
| N    | -4.1215039 | 1.3931432  | -0.2422107 |
| C    | -2.9318243 | 0.6437504  | -0.1188291 |
| C    | -5.3136396 | 0.7018715  | 0.0134124  |
| C    | -2.9825336 | -0.6937461 | -0.0423315 |
| C    | -5.3487916 | -0.6523374 | 0.0832258  |
| N    | -4.2084464 | -1.4310534 | -0.0887401 |
| S    | -1.4903932 | -1.5952055 | -0.2003604 |
| S    | -1.4635803 | 1.5593308  | -0.1794756 |
| Ni   | 0.0710915  | -0.0228070 | -0.1330388 |
| C    | -6.5004428 | 1.4644674  | 0.1223005  |
| N    | -7.4482852 | 2.1152115  | 0.2235098  |
| C    | -6.5769558 | -1.3318400 | 0.2860317  |
| N    | -7.5593030 | -1.9088929 | 0.4648070  |
| C    | 6.5993591  | -1.3925164 | 0.1024561  |
| N    | 7.5982038  | -1.9675178 | 0.1269442  |
| C    | 6.5606799  | 1.4743567  | 0.2165411  |
| N    | 7.5436491  | 2.0720607  | 0.2900669  |
| H    | -4.0700818 | 2.3263472  | 0.1483058  |
| H    | -4.2100249 | -2.2677114 | 0.4848420  |
| H    | -1.3697589 | -2.0584941 | 1.0667299  |

<sup>a</sup>Part of the Gaussian output file

SCF Done: E(RB3P86) = -4002.87531156 A.U. after 2 cycles

|                | 1       | 2       | 3       |
|----------------|---------|---------|---------|
|                | A       | A       | A       |
| Frequencies -- | 1.6216  | 22.1173 | 29.7321 |
| Red. masses -- | 10.3073 | 11.5796 | 12.5679 |

|                                              |                             |
|----------------------------------------------|-----------------------------|
| Zero-point correction=                       | 0.143492 (Hartree/Particle) |
| Thermal correction to Energy=                | 0.167743                    |
| Thermal correction to Enthalpy=              | 0.168687                    |
| Thermal correction to Gibbs Free Energy=     | 0.084191                    |
| Sum of electronic and zero-point Energies=   | -4002.731819                |
| Sum of electronic and thermal Energies=      | -4002.707569                |
| Sum of electronic and thermal Enthalpies=    | -4002.706625                |
| Sum of electronic and thermal Free Energies= | -4002.791121                |

| Item          | Value    | Threshold | Converged? |
|---------------|----------|-----------|------------|
| Maximum Force | 0.000002 | 0.000450  | YES        |
| RMS Force     | 0.000000 | 0.000300  | YES        |

**Table S11.** Geometry optimized for  $2e^-3H^+$  (+12.3) in its closed-shell singlet state. Optimized at B3P86 level of DFT using the 6-311+G(2d, p) basis set with solvation in water taken into consideration (C-PCM).<sup>a</sup>

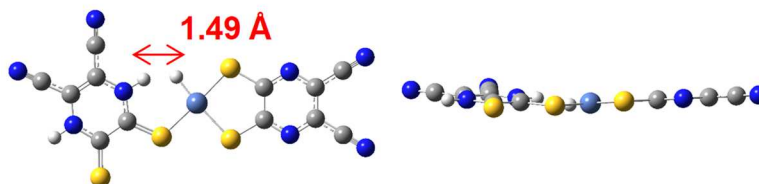

| Atom | X          | Y          | Z          |
|------|------------|------------|------------|
| N    | 4.2973573  | -1.2707715 | 0.1700136  |
| C    | 3.1550941  | -0.6107651 | 0.0483118  |
| C    | 5.4309377  | -0.5614090 | 0.1534737  |
| C    | 3.1485763  | 0.8248213  | -0.0938556 |
| C    | 5.4234430  | 0.8262691  | 0.0145862  |
| N    | 4.2799763  | 1.5099068  | -0.1076360 |
| S    | 1.6512600  | 1.6726663  | -0.2501728 |
| S    | 1.6701010  | -1.4790487 | 0.0608712  |
| N    | -3.0862727 | 0.6453352  | 0.0088428  |
| C    | -2.9206756 | -0.6881432 | -0.0532583 |
| C    | -4.2907894 | 1.2797255  | 0.0907729  |
| C    | -4.1294680 | -1.5298343 | -0.0209185 |
| C    | -5.4251162 | 0.5226771  | 0.1228649  |
| N    | -5.3033486 | -0.8402760 | 0.0668269  |
| S    | -4.1143609 | -3.1726446 | -0.0826019 |
| S    | -1.3996136 | -1.3704857 | -0.1618335 |
| Ni   | 0.1691971  | 0.1245695  | -0.1786960 |
| C    | -4.3188182 | 2.6945101  | 0.1438416  |
| N    | -4.3381727 | 3.8453070  | 0.1858129  |
| C    | -6.7179136 | 1.0903581  | 0.2118623  |
| N    | -7.7741714 | 1.5447178  | 0.2831372  |
| C    | 6.6406750  | 1.5733946  | -0.0023291 |
| N    | 7.6287215  | 2.1674610  | -0.0152845 |
| C    | 6.6573101  | -1.2827172 | 0.2843808  |
| N    | 7.6521103  | -1.8558297 | 0.3895484  |

|   |            |            |            |
|---|------------|------------|------------|
| H | -0.7371807 | 1.2850701  | -0.3605221 |
| H | -6.1450957 | -1.4054855 | 0.0926275  |
| H | -2.1863559 | 1.1703949  | -0.0560521 |

<sup>a</sup>Part of the Gaussian output file

SCF Done: E(RB3P86) = -4002.85657648 A.U. after 2 cycles

|                |         |         |         |
|----------------|---------|---------|---------|
|                | 1       | 2       | 3       |
|                | A       | A       | A       |
| Frequencies -- | 3.8217  | 23.5212 | 34.6225 |
| Red. masses -- | 15.0655 | 16.3560 | 15.2965 |

Zero-point correction= 0.142526 (Hartree/Particle)  
 Thermal correction to Energy= 0.166445  
 Thermal correction to Enthalpy= 0.167390  
 Thermal correction to Gibbs Free Energy= 0.084043  
 Sum of electronic and zero-point Energies= -4002.714050  
 Sum of electronic and thermal Energies= -4002.690131  
 Sum of electronic and thermal Enthalpies= -4002.689187  
 Sum of electronic and thermal Free Energies= -4002.772533

| Item          | Value    | Threshold | Converged? |
|---------------|----------|-----------|------------|
| Maximum Force | 0.000004 | 0.000450  | YES        |
| RMS Force     | 0.000000 | 0.000300  | YES        |

**Table S12.** Geometry optimized for  $2e^-3H^+$  (+14.3) in its closed-shell singlet state. Optimized at B3P86 level of DFT using the 6-311+G(2d, p) basis set with solvation in water taken into consideration (C-PCM).<sup>a</sup>

| Atom | X           | Y           | Z           |
|------|-------------|-------------|-------------|
| N    | 3.23159779  | -0.78273589 | -0.0388315  |
| C    | 3.05092599  | 0.53060168  | 0.01817973  |
| C    | 4.47141584  | -1.26716063 | -0.08026661 |
| C    | 4.22162781  | 1.38412455  | 0.02920283  |
| C    | 5.58647283  | -0.43573226 | -0.06916632 |
| N    | 5.43821467  | 0.89473812  | -0.01371036 |
| S    | 4.13738323  | 3.12799237  | 0.1001752   |
| S    | 1.48291683  | 1.25156765  | 0.06868907  |
| N    | -4.35488064 | 1.19197382  | -0.12509294 |
| C    | -3.14805879 | 0.60521293  | -0.04232355 |
| C    | -5.53297137 | 0.50058206  | -0.10440782 |
| C    | -3.15488322 | -0.85106737 | 0.08032963  |
| C    | -5.45372338 | -0.87348564 | 0.00793323  |
| N    | -4.29019467 | -1.53204087 | 0.09875744  |
| S    | -1.6613756  | -1.66837785 | 0.20046581  |
| S    | -1.73669539 | 1.50804687  | -0.08169272 |
| Ni   | -0.19420123 | -0.1081679  | 0.11329594  |
| C    | -6.748299   | 1.21226091  | -0.19668029 |
| N    | -7.74620145 | 1.78602782  | -0.27136358 |
| C    | -6.65107506 | -1.65559117 | 0.03133279  |
| N    | -7.61304247 | -2.28802363 | 0.05038463  |
| C    | 6.91380278  | -0.95524485 | -0.11548452 |
| N    | 7.98152779  | -1.3886688  | -0.15317237 |
| C    | 4.61368143  | -2.69135198 | -0.13856403 |
| N    | 4.73989048  | -3.83536827 | -0.18508294 |
| H    | -4.38432224 | 2.2033834   | -0.20744368 |
| H    | 0.75745319  | -1.18737615 | 0.24794912  |
| H    | 2.78696226  | 3.16482376  | 0.13128137  |

<sup>a</sup>Part of the Gaussian output file

SCF Done: E(RB3P86) = -4002.85014911 A.U. after 2 cycles

|                | 1       | 2       | 3       |
|----------------|---------|---------|---------|
|                | A       | A       | A       |
| Frequencies -- | 11.3242 | 20.8897 | 25.6892 |
| Red. masses -- | 14.1756 | 17.2555 | 15.4060 |

|                                              |                             |
|----------------------------------------------|-----------------------------|
| Zero-point correction=                       | 0.139321 (Hartree/Particle) |
| Thermal correction to Energy=                | 0.163720                    |
| Thermal correction to Enthalpy=              | 0.164664                    |
| Thermal correction to Gibbs Free Energy=     | 0.080878                    |
| Sum of electronic and zero-point Energies=   | -4002.710828                |
| Sum of electronic and thermal Energies=      | -4002.686429                |
| Sum of electronic and thermal Enthalpies=    | -4002.685485                |
| Sum of electronic and thermal Free Energies= | -4002.769271                |

| Item          | Value    | Threshold | Converged? |
|---------------|----------|-----------|------------|
| Maximum Force | 0.000002 | 0.000450  | YES        |
| RMS Force     | 0.000000 | 0.000300  | YES        |

**Table S13.** Geometry optimized for  $2e\text{-}3H^+$  (+15.5) in its open-shell singlet state. Optimized at UB3P86 level of DFT using the 6-311+G(2d, p) basis set with solvation in water taken into consideration (C-PCM).<sup>a</sup>

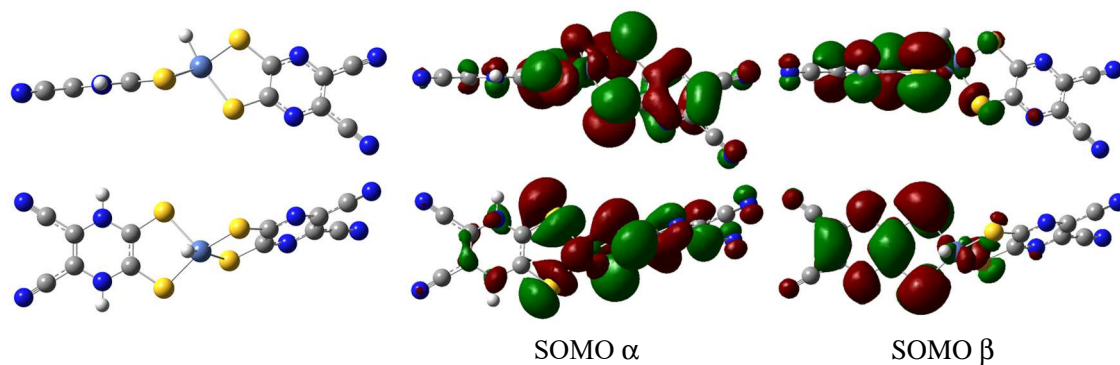

| Atom | X          | Y          | Z          | Mulliken spin densities |
|------|------------|------------|------------|-------------------------|
| N    | -4.2744879 | 1.0717335  | -0.7264723 | -0.015752               |
| C    | -3.0894296 | 0.5101563  | -0.5642360 | 0.022118                |
| C    | -5.3121045 | 0.5515187  | -0.0610026 | -0.000001               |
| C    | -2.9237659 | -0.6383634 | 0.2953101  | 0.005272                |
| C    | -5.1544912 | -0.5502622 | 0.7769350  | -0.000959               |
| N    | -3.9661848 | -1.1369721 | 0.9480768  | -0.016144               |
| S    | -1.3839193 | -1.3816124 | 0.4798949  | -0.012032               |
| S    | -1.7496462 | 1.1923859  | -1.4250262 | -0.039020               |
| N    | 3.8928645  | 1.2347830  | 0.8073195  | 0.175495                |
| C    | 2.7634747  | 0.5913480  | 0.3225783  | 0.161666                |
| C    | 5.1516607  | 0.7027165  | 0.6717205  | -0.004994               |
| C    | 2.9316819  | -0.6223469 | -0.3449555 | 0.205449                |
| C    | 5.3128809  | -0.4837557 | 0.0226884  | 0.011834                |
| N    | 4.2132120  | -1.1291148 | -0.4882397 | 0.171973                |
| S    | 1.6416162  | -1.5220840 | -0.9994261 | 0.094645                |
| S    | 1.2482478  | 1.3174646  | 0.5699556  | -0.033675               |
| Ni   | -0.0584911 | -0.0497530 | -0.7886001 | -0.724044               |
| C    | 6.2525098  | 1.4083372  | 1.2114215  | -0.002509               |
| N    | 7.1372531  | 1.9980796  | 1.6571940  | 0.007729                |
| C    | 6.5879960  | -1.0727865 | -0.1441810 | -0.003438               |
| N    | 7.6190815  | -1.5673810 | -0.2910522 | 0.004050                |
| C    | -6.2652927 | -1.1010438 | 1.4887114  | 0.001125                |



|   |            |            |            |           |
|---|------------|------------|------------|-----------|
| N | -7.1670612 | -1.5380861 | 2.0582463  | -0.002289 |
| C | -6.5870981 | 1.1687900  | -0.2433075 | 0.000398  |
| N | -7.6207182 | 1.6596926  | -0.3838836 | -0.001794 |
| H | 3.7709412  | 2.1046655  | 1.3053410  | -0.014054 |
| H | 0.5820363  | 0.6389691  | -1.8783629 | 0.021129  |

<sup>a</sup>Part of the Gaussian output file

SCF Done: E(UB3P86) = -4002.85105379 A.U. after 1 cycles

|                |         |         |         |
|----------------|---------|---------|---------|
|                | 1       | 2       | 3       |
|                | A       | A       | A       |
| Frequencies -- | 14.1140 | 19.1870 | 29.3082 |
| Red. masses -- | 16.0884 | 15.9485 | 12.5471 |

Zero-point correction= 0.141217 (Hartree/Particle)  
 Thermal correction to Energy= 0.165806  
 Thermal correction to Enthalpy= 0.166750  
 Thermal correction to Gibbs Free Energy= 0.083666  
 Sum of electronic and zero-point Energies= -4002.709837  
 Sum of electronic and thermal Energies= -4002.685248  
 Sum of electronic and thermal Enthalpies= -4002.684303  
 Sum of electronic and thermal Free Energies= -4002.767388

| Item          | Value    | Threshold | Converged? |
|---------------|----------|-----------|------------|
| Maximum Force | 0.000001 | 0.000450  | YES        |
| RMS Force     | 0.000000 | 0.000300  | YES        |

**Table S14.** Geometry optimized for  $2e^-3H^+$  (+20.6) in its closed-shell singlet state. Optimized at B3P86 level of DFT using the 6-311+G(2d,p) basis set with solvation in water taken into consideration (C-PCM).<sup>a</sup>

| Atom | X           | Y           | Z           |
|------|-------------|-------------|-------------|
| N    | -3.66861892 | 1.42139065  | -0.73616803 |
| C    | -2.79016794 | 0.46091076  | -0.48198365 |
| C    | -4.93074543 | 1.23949859  | -0.32680438 |
| C    | -3.20012129 | -0.74079689 | 0.21330147  |
| C    | -5.32240392 | 0.08407898  | 0.34511403  |
| N    | -4.4524772  | -0.90028005 | 0.60942823  |
| S    | -2.05660239 | -1.99633233 | 0.53080196  |
| S    | -1.15771907 | 0.64698341  | -0.98450437 |
| N    | 4.10145226  | -0.23356419 | -1.12326436 |
| C    | 2.89118024  | -0.37906746 | -0.5098313  |
| C    | 5.21245277  | 0.31471262  | -0.54199004 |
| C    | 2.80038953  | 0.06624568  | 0.89354867  |
| C    | 5.13185842  | 0.74722103  | 0.7455732   |
| N    | 3.93871533  | 0.61283093  | 1.41067148  |
| S    | 1.44280768  | -0.07678184 | 1.80601861  |
| S    | 1.64531901  | -1.05800331 | -1.3645668  |
| Ni   | -0.20524494 | -1.24450745 | -0.27016601 |
| C    | 6.4027252   | 0.40950439  | -1.30159253 |
| N    | 7.3669861   | 0.48235607  | -1.92752589 |
| C    | 6.23016113  | 1.32852753  | 1.42041104  |
| N    | 7.1175447   | 1.8046231   | 1.98044954  |
| C    | -6.67041782 | -0.09746327 | 0.77852122  |
| N    | -7.76183658 | -0.23595932 | 1.12497759  |
| C    | -5.86617709 | 2.28169652  | -0.60746586 |
| N    | -6.62808051 | 3.11834855  | -0.83035484 |
| H    | 4.16970034  | -0.55042737 | -2.0836838  |
| H    | 0.28655872  | -2.56236937 | 0.15321369  |
| H    | 3.88151643  | 0.92651947  | 2.37282086  |

<sup>a</sup>Part of the Gaussian output file

SCF Done: E(RB3P86) = -4002.84371224 A.U. after 1 cycles

|                | 1       | 2       | 3       |
|----------------|---------|---------|---------|
|                | A       | A       | A       |
| Frequencies -- | 12.4938 | 16.1062 | 27.9707 |
| Red. masses -- | 15.2600 | 15.7980 | 12.2439 |

|                                              |                             |
|----------------------------------------------|-----------------------------|
| Zero-point correction=                       | 0.142649 (Hartree/Particle) |
| Thermal correction to Energy=                | 0.166894                    |
| Thermal correction to Enthalpy=              | 0.167839                    |
| Thermal correction to Gibbs Free Energy=     | 0.084392                    |
| Sum of electronic and zero-point Energies=   | -4002.701064                |
| Sum of electronic and thermal Energies=      | -4002.676818                |
| Sum of electronic and thermal Enthalpies=    | -4002.675874                |
| Sum of electronic and thermal Free Energies= | -4002.759320                |

| Item          | Value    | Threshold | Converged? |
|---------------|----------|-----------|------------|
| Maximum Force | 0.000009 | 0.000450  | YES        |
| RMS Force     | 0.000002 | 0.000300  | YES        |

**Table S15.** Geometry optimized for  $1e-2H^+$  (+8.8) in its doublet state. Optimized at UB3P86 level of DFT using the 6-311+G(2d,p) basis set with solvation in water taken into consideration (C-PCM).<sup>a</sup>

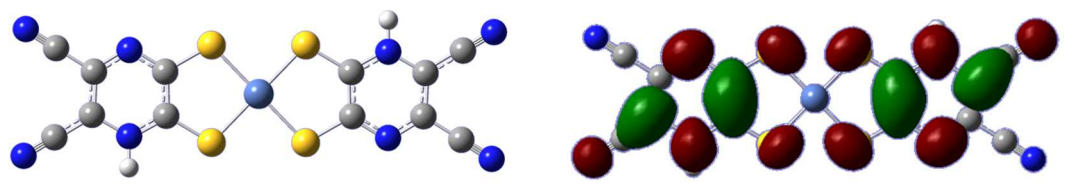

SOMO

| Atom | X           | Y           | Z           | Mulliken spin densities |
|------|-------------|-------------|-------------|-------------------------|
| N    | 4.15933572  | -1.41008487 | -0.00005259 | 0.145624                |
| C    | 3.00810316  | -0.7140176  | -0.00002587 | 0.049443                |
| C    | 5.29897856  | -0.71430824 | -0.00003524 | -0.063735               |
| C    | 2.97563997  | 0.69911028  | 0.00001761  | 0.098574                |
| C    | 5.36534136  | 0.66948381  | 0.00000791  | 0.147854                |
| N    | 4.16694682  | 1.35567702  | 0.00003214  | 0.160312                |
| S    | 1.51543535  | 1.56239658  | 0.00005633  | -0.015035               |
| S    | 1.5145774   | -1.5635868  | -0.00004949 | -0.028718               |
| N    | -4.16695332 | -1.35568944 | -0.0000037  | 0.160442                |
| C    | -2.97564309 | -0.69910251 | 0.00000307  | 0.098668                |
| C    | -5.3653521  | -0.66948326 | 0.00000204  | 0.147972                |
| C    | -3.00810268 | 0.71399972  | 0.00000595  | 0.049508                |
| C    | -5.29897729 | 0.71431362  | 0.00000793  | -0.063786               |
| N    | -4.15934038 | 1.41008958  | 0.00000999  | 0.145712                |
| H    | -4.17219755 | -2.36729214 | 0.00000143  | -0.009668               |
| S    | -1.51456636 | 1.56358057  | 0.00000067  | -0.028673               |
| S    | -1.51542931 | -1.56240136 | 0.0000109   | -0.014998               |
| Ni   | 0.00000224  | -0.00000343 | 0.00000419  | -0.010817               |
| C    | -6.57104166 | -1.39016817 | -0.00000037 | -0.032447               |
| N    | -7.56375961 | -1.98392789 | -0.00000171 | 0.066784                |
| C    | -6.5167086  | 1.46938554  | 0.00001348  | 0.003011                |
| N    | -7.49167884 | 2.08216863  | 0.00001707  | -0.016848               |
| C    | 6.57102806  | 1.39018349  | 0.00003187  | -0.032424               |
| N    | 7.56374003  | 1.98394708  | 0.00005299  | 0.066729                |
| C    | 6.51671077  | -1.46937692 | -0.00006483 | 0.003011                |

|   |            |             |             |           |
|---|------------|-------------|-------------|-----------|
| N | 7.49168244 | -2.08215675 | -0.00008943 | -0.016835 |
| H | 4.17219279 | 2.36728221  | 0.00005199  | -0.009660 |

<sup>a</sup>Part of the Gaussian output file

SCF Done: E(UB3P86) = -4002.26693000 A.U. after 1 cycles

|                |           |         |         |
|----------------|-----------|---------|---------|
|                | 1         | 2       | 3       |
|                | A         | A       | A       |
| Frequencies -- | -858.7738 | 16.9947 | 24.8308 |
| Red. masses -- | 12.4462   | 17.6510 | 12.6587 |

|                                              |                             |
|----------------------------------------------|-----------------------------|
| Zero-point correction=                       | 0.131475 (Hartree/Particle) |
| Thermal correction to Energy=                | 0.154976                    |
| Thermal correction to Enthalpy=              | 0.155921                    |
| Thermal correction to Gibbs Free Energy=     | 0.075265                    |
| Sum of electronic and zero-point Energies=   | -4002.135455                |
| Sum of electronic and thermal Energies=      | -4002.111954                |
| Sum of electronic and thermal Enthalpies=    | -4002.111009                |
| Sum of electronic and thermal Free Energies= | -4002.191665                |

| Item          | Value    | Threshold | Converged? |
|---------------|----------|-----------|------------|
| Maximum Force | 0.000168 | 0.000450  | YES        |
| RMS Force     | 0.000052 | 0.000300  | YES        |

**Table S16.** Geometry optimized for  $1e-2H^+$  (+9.7) in its doublet state. Optimized at UB3P86 level of DFT using the 6-311+G(2d,p) basis set with solvation in water taken into consideration (C-PCM).<sup>a</sup>

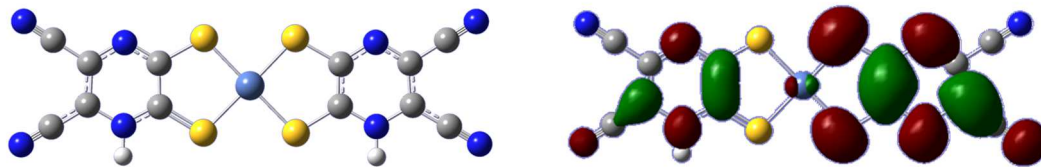

SOMO

| Atom | X           | Y           | Z           | Mulliken spin densities |
|------|-------------|-------------|-------------|-------------------------|
| N    | 4.18320864  | -1.36239252 | -0.00016907 | 0.238875                |
| C    | 2.98679878  | -0.6923951  | -0.00010395 | 0.158079                |
| C    | 5.37981822  | -0.65793159 | -0.00013635 | 0.217812                |
| C    | 3.0080145   | 0.6973423   | -0.00001001 | 0.091731                |
| C    | 5.29563056  | 0.73040304  | -0.00003995 | -0.096438               |
| N    | 4.1590111   | 1.42179453  | 0.00002276  | 0.194000                |
| S    | 1.49997456  | 1.55347195  | 0.00008324  | 0.020533                |
| S    | 1.52219342  | -1.576822   | -0.00015277 | 0.021194                |
| N    | -4.17713922 | -1.33497247 | 0.00014789  | 0.057336                |
| C    | -2.9822679  | -0.7107525  | 0.00008193  | 0.029267                |
| C    | -5.36618682 | -0.65017396 | 0.00014698  | 0.054367                |
| C    | -3.00612572 | 0.72978882  | 0.00001451  | 0.010719                |
| C    | -5.29966586 | 0.72897043  | 0.00006538  | -0.022413               |
| N    | -4.14684131 | 1.41242522  | 0.000003    | 0.061401                |
| H    | -4.19404588 | -2.3489879  | 0.00019314  | -0.003231               |
| S    | -1.51374372 | 1.55567973  | -0.00006433 | -0.030624               |
| S    | -1.53892653 | -1.57417467 | 0.00008665  | -0.021082               |
| Ni   | -0.00166563 | -0.01329061 | -0.00001233 | -0.005224               |
| C    | -6.57515379 | -1.37516067 | 0.0002341   | -0.012365               |
| N    | -7.56774156 | -1.96435097 | 0.00030572  | 0.024043                |
| C    | -6.50899923 | 1.49450421  | 0.00004321  | 0.001454                |
| N    | -7.47914358 | 2.11442009  | 0.00002293  | -0.006074               |
| C    | 6.51054977  | 1.49238344  | -0.00000153 | 0.002806                |
| N    | 7.48179545  | 2.11182977  | 0.00003137  | -0.024187               |
| C    | 6.5929432   | -1.35794899 | -0.00021261 | -0.046123               |

|   |            |             |             |           |
|---|------------|-------------|-------------|-----------|
| N | 7.5933748  | -1.94326961 | -0.00027616 | 0.099148  |
| H | 4.19091525 | -2.37191975 | -0.00020197 | -0.015004 |

<sup>a</sup>Part of the Gaussian output file

SCF Done: E(UB3P86) = -4002.26737216 A.U. after 1 cycles

|                |         |         |         |
|----------------|---------|---------|---------|
|                | 1       | 2       | 3       |
|                | A       | A       | A       |
| Frequencies -- | 17.5820 | 22.9726 | 45.2099 |
| Red. masses -- | 17.5980 | 12.8338 | 16.5559 |

|                                              |                             |
|----------------------------------------------|-----------------------------|
| Zero-point correction=                       | 0.133714 (Hartree/Particle) |
| Thermal correction to Energy=                | 0.157437                    |
| Thermal correction to Enthalpy=              | 0.158381                    |
| Thermal correction to Gibbs Free Energy=     | 0.077186                    |
| Sum of electronic and zero-point Energies=   | -4002.133658                |
| Sum of electronic and thermal Energies=      | -4002.109935                |
| Sum of electronic and thermal Enthalpies=    | -4002.108991                |
| Sum of electronic and thermal Free Energies= | -4002.190186                |

| Item          | Value    | Threshold | Converged? |
|---------------|----------|-----------|------------|
| Maximum Force | 0.000065 | 0.000450  | YES        |
| RMS Force     | 0.000017 | 0.000300  | YES        |

**Table S17.** Geometry optimized for  $1e^{-}2H^{+}$  (+14.2) in its doublet state. Optimized at UB3P86 level of DFT using the 6-311+G(2d,p) basis set with solvation in water taken into consideration (C-PCM).<sup>a</sup>

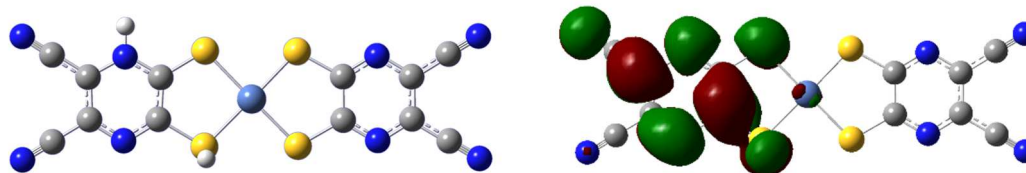

SOMO

| Atom | X           | Y           | Z           | Mulliken spin densities |
|------|-------------|-------------|-------------|-------------------------|
| N    | 4.18352531  | 1.40646745  | 0.03149604  | 0.000430                |
| C    | 3.05845365  | 0.71574694  | -0.00652011 | -0.000167               |
| C    | 5.33033708  | 0.71499007  | 0.04595065  | 0.000177                |
| C    | 3.0712883   | -0.71888772 | -0.03160972 | -0.000076               |
| C    | 5.34296319  | -0.67851528 | 0.01926445  | -0.000014               |
| N    | 4.20877077  | -1.3897828  | -0.01912221 | 0.000571                |
| S    | 1.57700962  | -1.57484571 | -0.09153361 | -0.000298               |
| S    | 1.54898884  | 1.54707366  | -0.02683654 | -0.001407               |
| N    | -4.13315597 | 1.37363108  | -0.02321493 | 0.225595                |
| C    | -2.95257878 | 0.69082095  | -0.01973958 | 0.010976                |
| C    | -5.35170737 | 0.70010606  | 0.01646493  | 0.336968                |
| C    | -3.03093619 | -0.69233862 | 0.00535578  | 0.208474                |
| C    | -5.30506579 | -0.69913503 | 0.04196823  | -0.084937               |
| N    | -4.18100461 | -1.39928773 | 0.02891598  | 0.209371                |
| H    | -4.11910731 | 2.38385695  | -0.04205943 | -0.013858               |
| S    | -1.50952297 | -1.59449879 | -0.07071807 | 0.008199                |
| S    | -1.48726352 | 1.56806247  | -0.04453922 | 0.015832                |
| Ni   | 0.04653089  | -0.02172584 | -0.05283562 | 0.001377                |
| C    | -6.54159226 | 1.43431801  | 0.02470559  | -0.078267               |
| N    | -7.5268051  | 2.04529955  | 0.03055046  | 0.163605                |
| C    | -6.53135189 | -1.43720725 | 0.07985203  | 0.003598                |
| N    | -7.51819787 | -2.03047276 | 0.11013037  | -0.028955               |
| C    | 6.57235434  | -1.4061208  | 0.03083016  | 0.000083                |
| N    | 7.56949192  | -1.98431793 | 0.03985874  | 0.000012                |
| C    | 6.54633882  | 1.46361159  | 0.08947708  | -0.000022               |



|   |             |             |            |          |
|---|-------------|-------------|------------|----------|
| N | 7.53293805  | 2.05861921  | 0.12474448 | 0.000112 |
| H | -1.45110459 | -1.99362565 | 1.21998657 | 0.022622 |

<sup>a</sup>Part of the Gaussian output file

SCF Done: E(UB3P86) = -4002.25721396 A.U. after 37 cycles

|                |         |         |         |
|----------------|---------|---------|---------|
|                | 1       | 2       | 3       |
|                | A       | A       | A       |
| Frequencies -- | 16.9424 | 27.9046 | 43.9489 |
| Red. masses -- | 16.7679 | 13.2500 | 16.0126 |

|                                              |                             |
|----------------------------------------------|-----------------------------|
| Zero-point correction=                       | 0.130881 (Hartree/Particle) |
| Thermal correction to Energy=                | 0.154637                    |
| Thermal correction to Enthalpy=              | 0.155581                    |
| Thermal correction to Gibbs Free Energy=     | 0.074330                    |
| Sum of electronic and zero-point Energies=   | -4002.126577                |
| Sum of electronic and thermal Energies=      | -4002.102821                |
| Sum of electronic and thermal Enthalpies=    | -4002.101877                |
| Sum of electronic and thermal Free Energies= | -4002.183129                |

| Item          | Value    | Threshold | Converged? |
|---------------|----------|-----------|------------|
| Maximum Force | 0.000123 | 0.000450  | YES        |
| RMS Force     | 0.000028 | 0.000300  | YES        |

**Table S18.** Geometry optimized for **1e<sup>-</sup>·2H<sup>+</sup> (+25.9)** in its doublet state. Optimized at UB3P86 level of DFT using the 6-311+G(2d,p) basis set with solvation in water taken into consideration (C-PCM).<sup>a</sup>

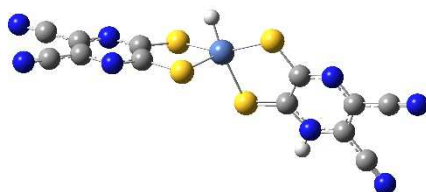

| Atom | X         | Y         | Z         | Mulliken spin densities |
|------|-----------|-----------|-----------|-------------------------|
| N1   | 3.881657  | -1.111663 | 0.892125  | 0.023799                |
| C2   | 2.792144  | -0.637204 | 0.258676  | 0.014469                |
| C3   | 5.12401   | -0.559931 | 0.781654  | 0.028908                |
| C4   | 3.012089  | 0.544672  | -0.571002 | -0.015208               |
| C5   | 5.248942  | 0.550305  | -0.02575  | -0.013736               |
| N6   | 4.21138   | 1.086431  | -0.685142 | 0.035127                |
| S7   | 1.704526  | 1.249991  | -1.420001 | 0.017142                |
| S8   | 1.303365  | -1.383641 | 0.438646  | -0.015194               |
| N9   | -3.876864 | 1.188046  | 0.953731  | 0.001263                |
| C10  | -2.845827 | 0.595118  | 0.366916  | -0.020581               |
| C11  | -5.094113 | 0.662415  | 0.777734  | 0.007414                |
| C12  | -3.054169 | -0.584578 | -0.446671 | -0.037599               |
| C13  | -5.291262 | -0.472081 | -0.002718 | -0.006107               |
| N14  | -4.267978 | -1.083946 | -0.611904 | -0.001168               |
| S15  | -1.736742 | -1.408238 | -1.19923  | 0.076682                |
| S16  | -1.272621 | 1.247328  | 0.614212  | 0.22677                 |
| C17  | -6.189613 | 1.313856  | 1.424467  | -0.000959               |
| N18  | -7.079782 | 1.832486  | 1.941754  | -0.000604               |
| C19  | -6.593443 | -1.029075 | -0.186802 | -0.001445               |
| N20  | -7.648566 | -1.471338 | -0.330037 | -0.00029                |
| C21  | 6.523057  | 1.179832  | -0.186245 | 0.00172                 |
| N22  | 7.547537  | 1.688292  | -0.316612 | -0.003123               |
| C23  | 6.199583  | -1.147113 | 1.485523  | -0.007173               |
| N24  | 7.082888  | -1.619611 | 2.055969  | 0.012248                |
| H25  | 3.762986  | -1.928622 | 1.483299  | -0.001172               |
| Ni26 | -0.033866 | -0.005534 | -0.854425 | 0.726982                |

H27      -0.731483      0.738352      -1.851303      -0.048164

<sup>a</sup>Part of the Gaussian output file

SCF Done: E(UB3P86) = -4002.23816540      A.U. after      2 cycles

Annihilation of the first spin contaminant:

S\*\*2 before annihilation      0.7705,      after      0.7503

|                |         |         |         |
|----------------|---------|---------|---------|
|                | 1       | 2       | 3       |
|                | A       | A       | A       |
| Frequencies -- | 15.1933 | 22.0967 | 28.8075 |
| Red. masses -- | 16.2507 | 16.5028 | 12.8429 |

|                                              |                             |
|----------------------------------------------|-----------------------------|
| Zero-point correction=                       | 0.130841 (Hartree/Particle) |
| Thermal correction to Energy=                | 0.154492                    |
| Thermal correction to Enthalpy=              | 0.155437                    |
| Thermal correction to Gibbs Free Energy=     | 0.073785                    |
| Sum of electronic and zero-point Energies=   | -4002.107324                |
| Sum of electronic and thermal Energies=      | -4002.083673                |
| Sum of electronic and thermal Enthalpies=    | -4002.082729                |
| Sum of electronic and thermal Free Energies= | -4002.164380                |

| Item          | Value    | Threshold | Converged? |
|---------------|----------|-----------|------------|
| Maximum Force | 0.000003 | 0.000450  | YES        |
| RMS Force     | 0.000001 | 0.000300  | YES        |

**Table S19.** Geometry optimized for  $1e^{-}2H^{+}$  (+33.0) in its doublet state. Optimized at UB3P86 level of DFT using the 6-311+G(2d,p) basis set with solvation in water taken into consideration (C-PCM).<sup>a</sup>

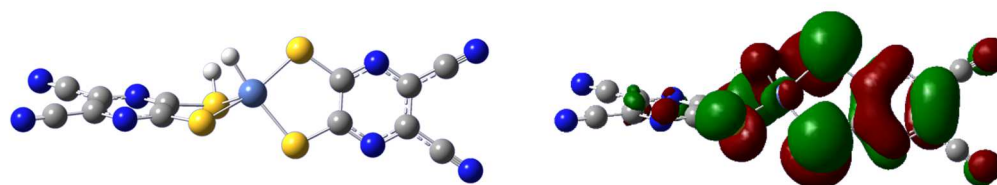

SOMO

| Atom | X           | Y           | Z           | Mulliken spin densities |
|------|-------------|-------------|-------------|-------------------------|
| N    | 4.26713884  | -1.18820134 | -0.46582177 | 0.001582                |
| C    | 3.02774105  | -0.75425133 | -0.2252453  | -0.026177               |
| C    | 5.28388644  | -0.42813251 | -0.07750365 | 0.000863                |
| C    | 2.86540314  | 0.46543987  | 0.50184259  | -0.012343               |
| C    | 5.09909784  | 0.80190044  | 0.55772344  | -0.004067               |
| N    | 3.86263284  | 1.22027187  | 0.86408888  | 0.005720                |
| S    | 1.22061771  | 0.92495814  | 1.00477385  | 0.131979                |
| S    | 1.69047259  | -1.67323503 | -0.78499155 | 0.059046                |
| N    | -4.01489286 | -1.09446299 | 0.85930965  | 0.012292                |
| C    | -2.92143996 | -0.63566108 | 0.26485374  | 0.004437                |
| C    | -5.16555392 | -0.45348458 | 0.63855365  | 0.001354                |
| C    | -2.9933556  | 0.52739135  | -0.58308909 | -0.007655               |
| C    | -5.23257449 | 0.66419321  | -0.19118177 | -0.001892               |
| N    | -4.14064543 | 1.14462828  | -0.79575774 | 0.012115                |
| S    | -1.58405114 | 1.16235213  | -1.37168198 | 0.041368                |
| S    | -1.42919871 | -1.45761226 | 0.51068602  | 0.020419                |
| Ni   | -0.00388974 | -0.17464914 | -0.67285161 | 0.795399                |
| C    | -6.3341625  | -0.96287112 | 1.28636866  | -0.001746               |
| N    | -7.28212512 | -1.36551582 | 1.80333651  | 0.002302                |
| C    | -6.46845896 | 1.33941467  | -0.42992232 | -0.000433               |
| N    | -7.47103849 | 1.87654625  | -0.61682687 | 0.001488                |
| C    | 6.1958144   | 1.63567922  | 0.92330896  | -0.000542               |
| N    | 7.0918323   | 2.3003192   | 1.21206333  | -0.002007               |
| C    | 6.60473364  | -0.92008564 | -0.3452876  | -0.001688               |
| N    | 7.66971211  | -1.30302133 | -0.5541054  | 0.002446                |

|   |            |            |             |           |
|---|------------|------------|-------------|-----------|
| H | 0.74781377 | 0.5421175  | -1.68370227 | -0.032799 |
| H | 1.35056597 | 2.23350713 | 0.71643171  | -0.001462 |

<sup>a</sup>Part of the Gaussian output file

SCF Done: E(UB3P86) = -4002.22339768 A.U. after 29 cycles

|                |         |         |         |
|----------------|---------|---------|---------|
|                | 1       | 2       | 3       |
|                | A       | A       | A       |
| Frequencies -- | 16.2946 | 21.8416 | 33.2153 |
| Red. masses -- | 15.4867 | 15.7601 | 13.3276 |

|                                              |                             |
|----------------------------------------------|-----------------------------|
| Zero-point correction=                       | 0.127327 (Hartree/Particle) |
| Thermal correction to Energy=                | 0.151032                    |
| Thermal correction to Enthalpy=              | 0.151976                    |
| Thermal correction to Gibbs Free Energy=     | 0.070474                    |
| Sum of electronic and zero-point Energies=   | -4002.096279                |
| Sum of electronic and thermal Energies=      | -4002.072574                |
| Sum of electronic and thermal Enthalpies=    | -4002.071629                |
| Sum of electronic and thermal Free Energies= | -4002.153132                |

| Item          | Value    | Threshold | Converged? |
|---------------|----------|-----------|------------|
| Maximum Force | 0.000035 | 0.000450  | YES        |
| RMS Force     | 0.000009 | 0.000300  | YES        |

**Table S20.** Geometry optimized for  $1e^{-}2H^{+}$  (+34.8) in its doublet state. Optimized at UB3P86 level of DFT using the 6-311+G(2d,p) basis set with solvation in water taken into consideration (C-PCM).<sup>a</sup>

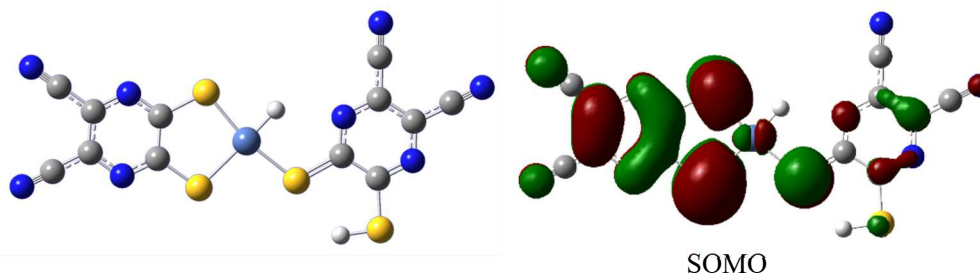

| Atom | X           | Y           | Z           | Mulliken spin densities |
|------|-------------|-------------|-------------|-------------------------|
| N    | -4.40553624 | -1.25212534 | 0.00467461  | 0.003716                |
| C    | -3.20918083 | -0.67226501 | 0.00574559  | 0.013662                |
| C    | -5.48219904 | -0.46710099 | -0.00151022 | 0.020472                |
| C    | -3.11073359 | 0.76383408  | 0.00036922  | -0.020356               |
| C    | -5.3799992  | 0.9241138   | -0.00685545 | -0.016083               |
| N    | -4.18490316 | 1.52537576  | -0.00577882 | 0.025992                |
| S    | -1.56142741 | 1.56401693  | 0.00183741  | 0.091247                |
| S    | -1.80472851 | -1.66043577 | 0.01380971  | 0.013227                |
| N    | 3.08782633  | 0.73964926  | 0.00180516  | 0.033226                |
| C    | 3.02134391  | -0.57650748 | -0.00159937 | -0.008520               |
| C    | 4.27990011  | 1.33540258  | 0.00070766  | -0.015774               |
| C    | 4.24308075  | -1.33797498 | -0.00662558 | 0.007838                |
| C    | 5.45585231  | 0.58954006  | -0.00351899 | 0.027635                |
| N    | 5.41842964  | -0.74270225 | -0.00718893 | -0.005056               |
| S    | 4.32247762  | -3.08058859 | -0.01246486 | -0.000493               |
| S    | 1.49222697  | -1.42210928 | -0.00030998 | 0.056861                |
| Ni   | -0.1979616  | -0.08248607 | 0.01125898  | 0.824249                |
| C    | 4.30315809  | 2.7656494   | 0.00405115  | 0.002366                |
| N    | 4.33658319  | 3.9167167   | 0.00663048  | -0.003668               |
| C    | 6.74060598  | 1.21678378  | -0.00390455 | -0.005636               |
| N    | 7.76830244  | 1.73646328  | -0.00413476 | 0.011521                |
| C    | -6.53923065 | 1.75737051  | -0.01384012 | 0.002191                |
| N    | -7.482131   | 2.42031084  | -0.01948184 | -0.002820               |
| C    | -6.76057136 | -1.11130827 | -0.00234229 | -0.003641               |

|   |             |             |             |           |
|---|-------------|-------------|-------------|-----------|
| N | -7.79460572 | -1.61900621 | -0.00303117 | 0.008994  |
| H | 0.79718401  | 0.97023227  | 0.00975595  | -0.060302 |
| H | 2.98904492  | -3.27275427 | -0.00948908 | -0.000848 |

<sup>a</sup>Part of the Gaussian output file

SCF Done: E(UB3P86) = -4002.21959745 A.U. after 3 cycles

|                |         |         |         |
|----------------|---------|---------|---------|
|                | 1       | 2       | 3       |
|                | A       | A       | A       |
| Frequencies -- | -3.3944 | 18.2489 | 23.3518 |
| Red. masses -- | 19.6024 | 15.2245 | 15.9052 |

Zero-point correction= 0.126484 (Hartree/Particle)  
 Thermal correction to Energy= 0.149820  
 Thermal correction to Enthalpy= 0.150764  
 Thermal correction to Gibbs Free Energy= 0.069332  
 Sum of electronic and zero-point Energies= -4002.093113  
 Sum of electronic and thermal Energies= -4002.069777  
 Sum of electronic and thermal Enthalpies= -4002.068833  
 Sum of electronic and thermal Free Energies= -4002.150265

| Item          | Value    | Threshold | Converged? |
|---------------|----------|-----------|------------|
| Maximum Force | 0.000015 | 0.000450  | YES        |
| RMS Force     | 0.000003 | 0.000300  | YES        |

**Table S21.** Geometry optimized for  $1e-2H^+$  (+41.3) in its doublet state. Optimized at UB3P86 level of DFT using the 6-311+G(2d,p) basis set with solvation in water taken into consideration (C-PCM).<sup>a</sup>

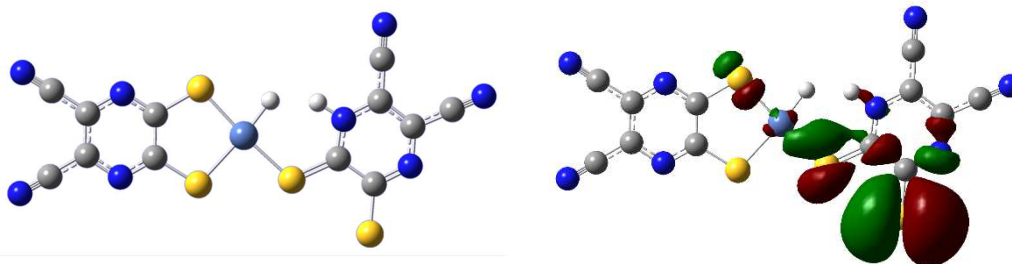

SOMO

| Atom | X           | Y           | Z           | Mulliken spin densities |
|------|-------------|-------------|-------------|-------------------------|
| N    | -4.31948233 | -1.26930207 | 0.00024799  | 0.001948                |
| C    | -3.16115886 | -0.62002521 | 0.00012837  | 0.020376                |
| C    | -5.43676817 | -0.54416616 | 0.00011703  | 0.025723                |
| C    | -3.14057122 | 0.81289161  | -0.00007384 | -0.023785               |
| C    | -5.41072487 | 0.8522464   | -0.00016503 | -0.017649               |
| N    | -4.25165725 | 1.51831334  | -0.00024093 | 0.031205                |
| S    | -1.63016558 | 1.68093511  | -0.00010405 | 0.126639                |
| S    | -1.69801519 | -1.51931581 | 0.00021986  | 0.008584                |
| N    | 3.1720785   | 0.65833942  | 0.00006568  | 0.037629                |
| C    | 2.99567859  | -0.65433466 | -0.00004897 | -0.001201               |
| C    | 4.39132586  | 1.26984421  | 0.00009049  | -0.000257               |
| C    | 4.19382357  | -1.5016967  | -0.0001639  | 0.004509                |
| C    | 5.49136508  | 0.42496017  | -0.00001733 | 0.011588                |
| N    | 5.39967348  | -0.89815049 | -0.00014281 | 0.017481                |
| S    | 4.05497784  | -3.17103725 | -0.00031355 | -0.011767               |
| S    | 1.43471579  | -1.36546131 | -0.00005259 | 0.030808                |
| Ni   | -0.17706192 | 0.11826598  | 0.00008712  | 0.764373                |
| C    | 4.46313538  | 2.67681125  | 0.00023661  | 0.001088                |
| N    | 4.53667496  | 3.82862544  | 0.00036082  | 0.003026                |
| C    | 6.81154923  | 0.98698909  | 0.00001408  | -0.002294               |
| N    | 7.87088784  | 1.43641288  | 0.00004132  | 0.006779                |
| C    | -6.61480637 | 1.62007799  | -0.00038656 | 0.002294                |
| N    | -7.59323335 | 2.22875869  | -0.00056258 | -0.002806               |
| C    | -6.67841871 | -1.2569101  | 0.00028539  | -0.004884               |



|   |             |             |            |           |
|---|-------------|-------------|------------|-----------|
| N | -7.68339827 | -1.81939764 | 0.00041981 | 0.011638  |
| H | 2.30903165  | 1.21857352  | 0.00014151 | -0.003910 |
| H | 0.71711421  | 1.28272287  | 0.00000158 | -0.037133 |

<sup>a</sup>Part of the Gaussian output file

SCF Done: E(UB3P86) = -4002.20450779 A.U. after 37 cycles

|                |         |         |         |
|----------------|---------|---------|---------|
|                | 1       | 2       | 3       |
|                | A       | A       | A       |
| Frequencies -- | 13.0296 | 16.9297 | 33.5170 |
| Red. masses -- | 15.4134 | 17.4772 | 16.3267 |

Zero-point correction= 0.130030 (Hartree/Particle)  
 Thermal correction to Energy= 0.153876  
 Thermal correction to Enthalpy= 0.154820  
 Thermal correction to Gibbs Free Energy= 0.071576  
 Sum of electronic and zero-point Energies= -4002.081371  
 Sum of electronic and thermal Energies= -4002.057526  
 Sum of electronic and thermal Enthalpies= -4002.056581  
 Sum of electronic and thermal Free Energies= -4002.139826

| Item          | Value    | Threshold | Converged? |
|---------------|----------|-----------|------------|
| Maximum Force | 0.000003 | 0.000450  | YES        |
| RMS Force     | 0.000001 | 0.000300  | YES        |

**Table S22.** Geometry optimized for the transition state for the H<sub>2</sub> evolution path via the hydride formation process (TS<sub>hydride</sub>); **2e<sup>-</sup>-3H<sup>+</sup> (+16.6)** in its open-shell singlet state. Optimized at UB3P86 level of DFT using the 6-311+G(2d,p) basis set with solvation in water taken into consideration (C-PCM).<sup>a</sup>

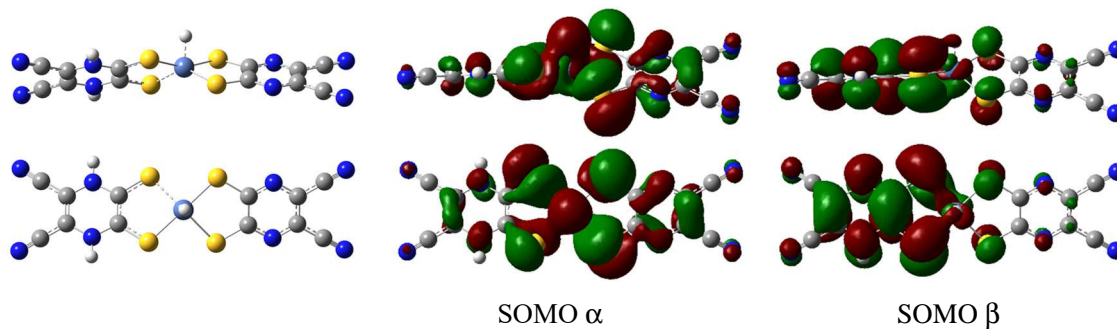

| Atom | X         | Y         | Z         | Mulliken spin densities |
|------|-----------|-----------|-----------|-------------------------|
| N    | -4.247090 | 1.255431  | -0.513029 | 0.005835                |
| C    | -3.099364 | 0.634732  | -0.294576 | -0.029064               |
| C    | -5.375715 | 0.626858  | -0.165880 | -0.001063               |
| C    | -3.069075 | -0.699072 | 0.262088  | -0.014837               |
| C    | -5.350103 | -0.643486 | 0.404733  | 0.001380                |
| N    | -4.202006 | -1.296278 | 0.611241  | 0.007709                |
| S    | -1.580842 | -1.530514 | 0.483242  | 0.136475                |
| S    | -1.644902 | 1.484034  | -0.675379 | 0.012464                |
| N    | 4.141561  | 1.270654  | 0.577927  | -0.172513               |
| C    | 2.933622  | 0.666319  | 0.265879  | -0.171237               |
| C    | 5.345661  | 0.641194  | 0.378592  | -0.006290               |
| C    | 2.958720  | -0.632471 | -0.243587 | -0.176060               |
| C    | 5.366821  | -0.624078 | -0.126598 | -0.011384               |
| N    | 4.183116  | -1.251580 | -0.431612 | -0.171798               |
| S    | 1.549116  | -1.487990 | -0.662913 | -0.085787               |
| S    | 1.491735  | 1.528075  | 0.500981  | -0.014427               |
| Ni   | -0.062276 | 0.001747  | -0.299435 | 0.660015                |
| C    | 6.538283  | 1.328887  | 0.705565  | 0.003293                |
| N    | 7.498994  | 1.905082  | 0.977942  | -0.006539               |
| C    | 6.580805  | -1.314922 | -0.350094 | 0.005799                |
| N    | 7.560068  | -1.893064 | -0.540072 | -0.006760               |

|   |           |           |           |           |
|---|-----------|-----------|-----------|-----------|
| C | -6.557715 | -1.302946 | 0.791819  | 0.000218  |
| N | -7.536796 | -1.826934 | 1.101210  | -0.000211 |
| C | -6.608166 | 1.308154  | -0.404311 | -0.001421 |
| N | -7.608286 | 1.849728  | -0.593295 | 0.001250  |
| H | 4.122079  | 2.201614  | 0.968613  | 0.012831  |
| H | 4.202605  | -2.164117 | -0.863574 | 0.011171  |

<sup>a</sup>Part of the Gaussian output file

SCF Done: E(UB3P86) = -4002.84826600 A.U. after 1 cycles

|                |           |         |         |
|----------------|-----------|---------|---------|
|                | 1         | 2       | 3       |
|                | A         | A       | A       |
| Frequencies -- | -136.6876 | 14.9248 | 26.3141 |
| Red. masses -- | 1.1676    | 16.5583 | 15.5101 |

Zero-point correction= 0.139326 (Hartree/Particle)  
 Thermal correction to Energy= 0.163801  
 Thermal correction to Enthalpy= 0.164746  
 Thermal correction to Gibbs Free Energy= 0.082601  
 Sum of electronic and zero-point Energies= -4002.708940  
 Sum of electronic and thermal Energies= -4002.684465  
 Sum of electronic and thermal Enthalpies= -4002.683520  
 Sum of electronic and thermal Free Energies= -4002.765665

| Item          | Value    | Threshold | Converged? |
|---------------|----------|-----------|------------|
| Maximum Force | 0.000004 | 0.000450  | YES        |
| RMS Force     | 0.000001 | 0.000300  | YES        |

**Table S23.** Geometry optimized for the transition state for the H<sub>2</sub> evolution path without hydride formation (TS<sub>ligand</sub>); 2e<sup>-</sup>-3H<sup>+</sup> (+36.8) in its closed-shell singlet state. Optimized at B3P86 level of DFT using the 6-311+G(2d,p) basis set with solvation in water taken into consideration (C-PCM).<sup>a</sup>

| Atom | X         | Y         | Z         |
|------|-----------|-----------|-----------|
| N    | -4.166858 | 1.410677  | 0.125136  |
| C    | -3.046833 | 0.714848  | 0.039589  |
| C    | -5.317213 | 0.726541  | 0.138705  |
| C    | -3.070091 | -0.718574 | -0.031264 |
| C    | -5.340105 | -0.665769 | 0.064714  |
| N    | -4.212516 | -1.382199 | -0.019673 |
| S    | -1.583171 | -1.583566 | -0.134824 |
| S    | -1.533008 | 1.536857  | 0.008143  |
| N    | 4.046185  | 1.380210  | -0.212902 |
| C    | 2.936819  | 0.572335  | -0.408409 |
| C    | 5.224435  | 0.701004  | 0.037011  |
| C    | 2.918608  | -0.789258 | -0.164824 |
| C    | 5.274511  | -0.663398 | 0.118346  |
| N    | 4.125223  | -1.403441 | 0.004597  |
| S    | 1.466760  | -1.671847 | -0.043596 |
| S    | 1.516918  | 1.488302  | -0.384894 |
| N    | -0.046736 | -0.044967 | -0.113251 |
| C    | 6.408729  | 1.477227  | 0.162683  |
| N    | 7.353789  | 2.126071  | 0.281864  |
| C    | 6.499817  | -1.357525 | 0.289629  |
| N    | 7.491528  | -1.923451 | 0.442418  |
| C    | -6.574499 | -1.384991 | 0.075147  |
| N    | -7.575659 | -1.956161 | 0.083456  |
| C    | -6.527114 | 1.480751  | 0.231270  |
| N    | -7.508595 | 2.080553  | 0.305628  |
| H    | 3.583157  | 2.134517  | 0.628927  |
| H    | 4.161303  | -2.406638 | 0.129373  |

<sup>a</sup>Part of the Gaussian output file

SCF Done: E(RB3P86) = -4002.81458027 A.U. after 1 cycles

|                | 1          | 2       | 3       |
|----------------|------------|---------|---------|
|                | A          | A       | A       |
| Frequencies -- | -1829.8737 | 16.1491 | 31.3311 |
| Red. masses -- | 1.0768     | 17.1227 | 12.1512 |

|                                              |                             |
|----------------------------------------------|-----------------------------|
| Zero-point correction=                       | 0.136425 (Hartree/Particle) |
| Thermal correction to Energy=                | 0.159865                    |
| Thermal correction to Enthalpy=              | 0.160810                    |
| Thermal correction to Gibbs Free Energy=     | 0.081070                    |
| Sum of electronic and zero-point Energies=   | -4002.678156                |
| Sum of electronic and thermal Energies=      | -4002.654715                |
| Sum of electronic and thermal Enthalpies=    | -4002.653771                |
| Sum of electronic and thermal Free Energies= | -4002.733510                |

| Item          | Value    | Threshold | Converged? |
|---------------|----------|-----------|------------|
| Maximum Force | 0.000000 | 0.000450  | YES        |
| RMS Force     | 0.000000 | 0.000300  | YES        |

**Table S24.** SCF energies given for the model systems optimized at the B3P86/6-311+G(2d,p) level of DFT in either restricted (B3P86) or unrestricted (UB3P86) model under water solvated condition using conductor-like polarizable continuum model (C-PCM) method implemented in the Gaussian 09/16 packages. All the structures given were confirmed as a local minimum structure.

| Spin State                                                              | Uncorrected SCF Energy (hartree) | Thermal correction to Gibbs Free Energy (hartree) | Sum of electronic and thermal Free Energies (hartree) | Sum of electronic and thermal Free Energies (kcal/mol) | Relative Energy (kcal/mol) | Coordinates |
|-------------------------------------------------------------------------|----------------------------------|---------------------------------------------------|-------------------------------------------------------|--------------------------------------------------------|----------------------------|-------------|
| Non-reduced nonprotonated species ( <b>0e-0H<sup>+</sup></b> )          |                                  |                                                   |                                                       |                                                        |                            |             |
| closed-shell singlet                                                    | -4001.238                        | 0.054614                                          | -4001.183                                             | -2510782.485                                           |                            | Table S2    |
| Non-reduced monoprotated species ( <b>0e-1H<sup>+</sup></b> )           |                                  |                                                   |                                                       |                                                        |                            |             |
| closed-shell singlet                                                    | -4001.672                        | 0.068304                                          | -4001.604                                             | -2511046.473                                           |                            | Table S3    |
| Non-reduced diprotated species ( <b>0e-2H<sup>+</sup></b> )             |                                  |                                                   |                                                       |                                                        |                            |             |
| closed-shell singlet                                                    | -4002.101                        | 0.081326                                          | -4002.020                                             | -2511307.295                                           |                            | Table S4    |
| One-electron-reduced monoprotated species ( <b>1e-1H<sup>+</sup></b> )  |                                  |                                                   |                                                       |                                                        |                            |             |
| doublet                                                                 | -4001.831                        | 0.06297                                           | -4001.768                                             | -2511149.189                                           |                            | Table S5    |
| One-electron-reduced diprotated species ( <b>1e-2H<sup>+</sup></b> )    |                                  |                                                   |                                                       |                                                        |                            |             |
| doublet                                                                 | -4002.283                        | 0.077074                                          | -4002.206                                             | -2511424.096                                           | 0.000                      | Table S6    |
| doublet                                                                 | -4002.267                        | 0.075265                                          | -4002.192                                             | -2511415.292                                           | 8.804                      | Table S15   |
| doublet                                                                 | -4002.267                        | 0.077186                                          | -4002.190                                             | -2511414.364                                           | 9.732                      | Table S16   |
| doublet                                                                 | -4002.257                        | 0.07433                                           | -4002.183                                             | -2511409.935                                           | 14.160                     | Table S17   |
| doublet                                                                 | -4002.238                        | 0.073785                                          | -4002.164                                             | -2511398.170                                           | 25.926                     | Table S18   |
| doublet                                                                 | -4002.223                        | 0.070474                                          | -4002.153                                             | -2511391.112                                           | 32.984                     | Table S19   |
| doublet                                                                 | -4002.220                        | 0.069332                                          | -4002.150                                             | -2511389.313                                           | 34.783                     | Table S20   |
| doublet                                                                 | -4002.205                        | 0.071576                                          | -4002.140                                             | -2511382.762                                           | 41.333                     | Table S21   |
| One-electron-reduced triprotonated species ( <b>1e-3H<sup>+</sup></b> ) |                                  |                                                   |                                                       |                                                        |                            |             |
| doublet                                                                 | -4002.714                        | 0.090891                                          | -4002.623                                             | -2511685.768                                           |                            | Table S7    |

| Two-electron-reduced diprotonated species ( $2e^-2H^+$ )  |           |          |           |              |        |           |
|-----------------------------------------------------------|-----------|----------|-----------|--------------|--------|-----------|
| closed-shell singlet                                      | -4002.443 | 0.077225 | -4002.366 | -2511524.524 |        | Table S8  |
| Two-electron-reduced triprotonated species ( $2e^-3H^+$ ) |           |          |           |              |        |           |
| closed-shell singlet                                      | -4002.882 | 0.089975 | -4002.792 | -2511792.055 | 0.000  | Table S9  |
| closed-shell singlet                                      | -4002.875 | 0.084191 | -4002.791 | -2511791.456 | 0.599  | Table S10 |
| closed-shell singlet                                      | -4002.857 | 0.084043 | -4002.773 | -2511779.792 | 12.263 | Table S11 |
| closed-shell singlet                                      | -4002.850 | 0.080878 | -4002.769 | -2511777.745 | 14.310 | Table S12 |
| open-shell singlet                                        | -4002.851 | 0.083666 | -4002.767 | -2511776.564 | 15.491 | Table S13 |
| closed-shell singlet                                      | -4002.844 | 0.084392 | -4002.759 | -2511771.501 | 20.554 | Table S14 |
| open-shell singlet<br>( $TS_{\text{hydride}}$ )           | -4002.848 | 0.082601 | -4002.766 | -2511775.482 | 16.573 | Table S22 |
| closed-shell singlet<br>( $TS_{\text{ligand}}$ )          | -4002.815 | 0.08107  | -4002.734 | -2511755.305 | 36.750 | Table S23 |

## References

- (1) M. J. Frisch *et al.*, Gaussian 09 Revision C.01 (Gaussian Inc., Wallingford CT, 2009); M. J. Frisch *et al.*, Gaussian 16 Revision A.03 (Gaussian Inc., Wallingford CT, 2016).
- (2) J. P. Perdew, *Phys. Rev. B*, **1986**, *33*, 8822-8824.
- (3) A. D. Becke, *J. Chem. Phys.*, **1993**, *98*, 5648-5652.
- (4) V. Barone, M. Cossi, *J. Phys. Chem. A*, **1998**, *102*, 1995-2001.
- (5) M. Cossi, N. Reaga, G. Scalmani, V. Barone, *J. Comput. Chem.*, **2003**, *24*, 669-681.
- (6) M. T. Huynh, W. Wang, T. B. Rauchfuss, S. Hammes-Schiffer, *Inorg. Chem.*, **2014**, *53*, 10301-10311.
- (7) D. K. Bediako, B. H. Solis, D. K. Dogutan, M. M. Roubelakis, A. G. Maher, C. H. Lee, M. B. Chambers, S. Hammes-Schiffer, D. G. Nocera, *Proc. Natl. Acad. Sci. USA*, **2014**, *111*, 15001-15006.
- (8) Solis, B. H.; Hammes-Schiffer, S. *Inorg. Chem.*, **2014**, *53*, 6427-6443.
- (9) B. H. Solis, A. G. Maher, D. K. Dogutan, D. G. Nocera, S. Hammes-Schiffer, *Proc. Nat. Acad. Sci. USA*, **2016**, *113*, 485-492.
- (10) B. H. Solis, S. Hammes-Schiffer, *J. Am. Chem. Soc.*, **2011**, *133*, 19036-19039.
- (11) B. H. Solis, S. Hammes-Schiffer, *Inorg. Chem.*, **2011**, *50*, 11252-11262.
- (12) S. Chen, R. Rousseau, S. Raugei, M. Dupuis, D. L. DuBois, R. M. Bullock, *Organometallics*, **2011**, *30*, 6108-6118.
- (13) B. H. Solis, A. G. Maher, T. Honda, D. C. Powers, D. G. Nocera, S. Hammes-Schiffer, *ACS Catal.*, **2014**, *4*, 4516-4526.
- (14) B. A. Anjali, F. B. Sayyed, C. H. Suresh, *J. Phys. Chem. A*, **2016**, *120*, 1112-1119.
- (15) S. Horvath, L. E. Fernandez, A. M. Appel, S. Hammes-Schiffer, *Inorg. Chem.*, **2013**, *52*, 3643-3652.
- (16) H. Ozawa, M. Haga and K. Sakai, *J. Am. Chem. Soc.*, **2006**, *128*, 4926-4927.
- (17) K. Koshiba, K. Yamauchi, K. Sakai, *Angew. Chem. Int. Ed.* **2017**, *56*, 4247.
- (18) Y. Aimoto, K. Koshiba, K. Yamauchi, K. Sakai, *Chem. Commun.*, **2018**, *54*, 12820-12823.
- (19) A. Dutta, S. Lense, J. Hou, M. H. Engelhard, J. A. S. Roberts, W. J. Shaw, *J. Am. Chem. Soc.* **2013**, *135*, 18490-18496.
- (20) C. Tsay, J. Y. Yang, *J. Am. Chem. Soc.* **2016**, *138*, 14174-14177.
- (21) A. J. Bard, L. R. Faulkner, *Electrochemical Methods: Fundamentals and Applications* (2nd ed.); John Wiley & Sons, Inc.: New Jersey, 2001, Chapter 9, p. 339.
- (22) R. N. Adams, *Electrochemistry at Solid Electrodes*; Marcel Dekker: New York, 1969, p. 220-222.
- (23) D. G. Leaist, *Can. J. Chem.* **1988**, *66*, 2452-2457.
- (24) The value of 0.99 was calculated from the data of "Physical Properties of Solvents" provided by Sigma Aldrich.
- (25) K. J. Laidler, M. C. Klng, *J. Phys. Chem.* **1983**, *87*, 2657-2664.
